1 **Title: FliW and CsrA govern flagellin (FliC) synthesis and play pleiotropic roles in**  
2 **virulence and physiology of *Clostridioides difficile* R20291**

3 **Running title: Coregulations of Fliw, CsrA, and FliC in *C. difficile***

4 Authors: Duolong Zhu<sup>a</sup>, Shaohui Wang<sup>a</sup>, Xingmin Sun<sup>a#</sup>

5 Affiliations: <sup>a</sup>Department of Molecular Medicine, Morsani College of Medicine, University of  
6 South Florida, Tampa, FL, United States

7 <sup>#</sup> Corresponding author.

8 Address: 12901 Bruce B. Downs Blvd Tampa, FL 33612, United States

9 Fax: +1-8139747357

10 E-mail: sun5@usf.edu

11 Phone: Phone: +1-8139744553

12

13

14

15

16

17

18

19

20

21

22

23

24 **ABSTRACT**

25 *Clostridioides difficile* is a Gram-positive, spore-forming, and toxin-producing anaerobe that can  
26 cause nosocomial antibiotic-associated intestinal disease. In *C. difficile*, the expression of  
27 flagellar genes is coupled to toxin gene regulation and bacterial colonization and virulence. The  
28 flagellin FliC is responsible for pleiotropic gene regulation during *in vivo* infection. However,  
29 how *fliC* expression is regulated is unclear. In *Bacillus subtilis*, flagellin homeostasis and  
30 motility are coregulated by flagellar assembly factor FliW, Flagellin Hag (FliC homolog), and  
31 CsrA (Carbon storage regulator A), which is referred to as partner-switching mechanism “FliW-  
32 CsrA-Hag”. In this study, we characterized FliW and CsrA functions by deleting or  
33 overexpressing *fliW*, *csrA*, and *fliW-csrA* in *C. difficile* R20291. We showed that both *fliW*  
34 deletion or *csrA* overexpression in R20291, and *csrA* complementation in R20291 $\Delta$ WA (*fliW*-  
35 *csrA* codeletion) dramatically decreased FliC production, however, *fliC* gene transcription was  
36 unaffected. While suppression of *fliC* translation by *csrA* overexpression was mostly relieved  
37 when *fliW* was coexpressed, and no significant difference in FliC production was detected when  
38 only *fliW* was complemented in R20291 $\Delta$ WA. Further, loss of *fliW* led to increased biofilm  
39 formation, cell adhesion, toxin production, and pathogenicity in a mouse model of *C. difficile*  
40 infection (CDI), while *fliW-csrA* codeletion decreased toxin production and mortality *in vivo*.  
41 Taken together, these data suggest that CsrA negatively modulates *fliC* expression and FliW  
42 indirectly affects *fliC* expression through inhibition of CsrA post-transcriptional regulation,  
43 which seems similar to the “FliW-CsrA-Hag” switch in *B. subtilis*. Our data also suggest that  
44 “FliW-CsrA-*fliC*/FliC” can regulate many facets of *C. difficile* R20291 pathogenicity.

45 **IMPORTANCE**

46 *C. difficile* flagellin FliC is associated with toxin gene expression, bacterial colonization and  
47 virulence, and is also involved in pleiotropic gene regulation during *in vivo* infection. However,  
48 how *fliC* expression is regulated remains unclear. In light of “FliW-CsrA-Hag” switch  
49 coregulation mechanism reported in *B. subtilis*, we showed that *fliW* and *csrA* play an important  
50 role in flagellin synthesis which affects *C. difficile* motility directly. Our data also suggest that  
51 FliW-CsrA-*fliC*/FliC” can regulate many facets of *C. difficile* R20291 pathogenicity. These  
52 findings further aid us in understanding the virulence regulation in *C. difficile*.

53 **KEYWORDS** *Clostridioides difficile*, FliW, FliC, CsrA, R20291, virulence

54

55

56

57

58

59

60

61

62

63

64

65

66

67

68

## 69 INTRODUCTION

70 *Clostridioides difficile* (formerly *Clostridium difficile*) (1, 2) is a Gram-positive, spore-forming,  
71 toxin-producing, anaerobic bacterium that is a leading cause of nosocomial antibiotic-associated  
72 diarrhea in the developed countries (3). *C. difficile* infection (CDI) can result in a spectrum of  
73 symptoms, ranging from mild diarrhea to pseudomembranous colitis and potential death (4). *C.*  
74 *difficile* has many virulence factors, among which toxin A (TcdA) and toxin B (TcdB) are the  
75 major ones (5, 6). These toxins can disrupt the actin cytoskeleton of intestinal cells through  
76 glucosylation of the Rho family of GTPases, and induce mucosal inflammation and symptoms  
77 associated with CDI (7).

78 The carbon storage regulator A (CsrA) has been reported to control various physiological  
79 processes, such as flagella synthesis, virulence, central carbon metabolism, quorum sensing,  
80 motility, biofilm formation in pathogens including *Pseudomonas aeruginosa*, *Pseudomonas*  
81 *syringae*, *Borrelia burgdorferi*, *Salmonella typhimurium*, and *Proteus mirabilis* (8-14). It is a  
82 widely distributed RNA binding protein that post-transcriptionally modulates gene expression  
83 through regulating mRNA stability and / or translation initiation of target mRNA (13, 15). CsrA  
84 typically binds to multiple specific sites that are located nearby or overlapping the cognate  
85 Shine-Dalgarno (SD) sequence in the target transcripts (16, 17). The roles of CsrA in *Bacillus*  
86 *subtilis* have been also reported (17-20). Yakhnin et al. (17) first reported that CsrA in *B. subtilis*  
87 can regulate translation initiation of the flagellin (*hag*) by preventing ribosome binding to the *hag*  
88 transcript. Meanwhile, two CsrA binding sites (BS1: A51 to A55; BS2: C75 to G82) were  
89 identified in the *hag* leader of mRNA, among which BS2 overlaps with the *hag* mRNA SD  
90 sequence. Mukherjee et al. (18) elucidated that the interaction between CsrA and FliW could  
91 govern flagellin homeostasis and checkpoint on flagellar morphogenesis in *B. subtilis*. FliW, the

92 first protein antagonist of CsrA activity was also identified and characterized in *B. subtilis*. They  
93 elegantly demonstrated a novel regulation system “a partner-switching mechanism” (Hag-FliW-  
94 CsrA) on flagellin synthesis in *B. subtilis*. Briefly, following the flagellar assembly checkpoint of  
95 hook completion, FliW was released from a FliW-Hag complex. Afterward, FliW binds to CsrA  
96 which will relieve CsrA-mediated *hag* translation repression for flagellin synthesis concurrent  
97 with filament assembly. Thus, flagellin homeostasis restricts its own expression on the  
98 translational level. Results also suggested that CsrA has an ancestral role in flagella assembly  
99 and has evolved to coregulate multiple cellular processes with motility. Oshiro et al. (19) further  
100 quantitated the interactions in the Hag-FliW-CsrA system. They found that Hag-FliW-CsrA<sup>dimer</sup>  
101 functions at nearly 1:1:1 stoichiometry. The Hag-FliW-CsrA<sup>dimer</sup> system is hypersensitive to the  
102 cytoplasmic Hag concentration and is robust to perturbation.

103 Recently, the role of CsrA on carbon metabolism and virulence associated processes in *C.*  
104 *difficile* 630Δerm was analyzed by overexpressing the *csrA* gene (20). Authors showed that the  
105 *csrA* overexpression can increase motility ability, toxin production, and cell adherence, and  
106 induce carbon metabolism change. *C. difficile* flagellin gene *fliC* is associated with toxin gene  
107 expression, bacterial colonization, and virulence, and is responsible for pleiotropic gene  
108 regulation during *in vivo* infection (21-25). The delicate regulations among *fliC* gene expression,  
109 toxin production, bacterial motility, colonization, and pathogenicity in *C. difficile* are indicated.  
110 Though the important roles of CsrA in flagellin synthesis and flagellin homeostasis have been  
111 studied in other bacteria (17-19), the regulation of FliW, CsrA, and FliC and the function of *fliW*  
112 in *C. difficile* remain unclear.

113 In this communication, we aimed to study the involvement of FliW and CsrA in *fliC*  
114 expression and *C. difficile* virulence and physiology by constructing and analyzing *fliW* and *fliW*-

115 *csrA* deletion mutants of *C. difficile* R20291. We evaluated these mutants in expression of *fliC*,  
116 motility, adhesion, biofilm formation, toxin production, sporulation, germination, and  
117 pathogenicity in a mouse model of CDI.

## 118 **RESULTS**

### 119 **Construction of *fliW* and *fliW-csrA* deletion mutants and complementation strains**

120 The *C. difficile* R20291 flagellar gene operon was analyzed through the *IMG/M* website  
121 (<https://img.jgi.doe.gov/>), and the late-stage flagellar genes (F1) were drawn as Fig. 1A (21).  
122 Among them, *fliW* and *csrA* genes have a 10 bp overlap and were demonstrated as  
123 cotranscription by RT-PCR (Fig. S1).

124 To analyze the role of *fliW* and *csrA* in R20291, CRISPR-AsCpfI based plasmid pDL1  
125 (pMTL82151-Ptet-AscpfI) was constructed for gene deletion in *C. difficile* (26, 27). pDL1-*fliW*  
126 and pDL1-*csrA* gene deletion plasmids were constructed, and the *fliW* gene (288 bp deletion)  
127 (R20291 $\Delta$ *fliW*, referred hereafter as R20291 $\Delta$ W) was deleted successfully. However, after  
128 several trials, we couldn't get the *csrA* gene deletion mutant possibly due to its small size (213  
129 bp). Therefore, *fliW-csrA* codeletion plasmid pDL1-*fliW-csrA* was constructed and the *fliW-csrA*  
130 (445 bp deletion) codeletion mutant (R20291 $\Delta$ *fliW-csrA*, referred hereafter as R20291 $\Delta$ WA) was  
131 obtained (Fig. 1 B and C). To study the role of *csrA* in R20291, the single gene complementation  
132 strain R20291 $\Delta$ WA-W and R20291 $\Delta$ WA-A were constructed. R20291, R20291-pMTL84153  
133 (R20291-E), R20291 $\Delta$ W-pMTL84153 (R20291 $\Delta$ W-E), and R20291 $\Delta$ WA-pMTL84153  
134 (R20291 $\Delta$ WA-E) were used as control strains when needed.

135 The effects of *fliW* and *fliW-csrA* deletion on R20291 growth were evaluated. Fig. 1D  
136 showed that there was no significant difference in bacterial growth between wild type strain and  
137 mutants in BHIS media.

138 **Effects of *fliW* and *fliW-csrA* deletions on *C. difficile* motility and biofilm formation**

139 To characterize the effects of *fliW* and *fliW-csrA* deletions on *C. difficile* motility, swimming (Fig.  
140 2A; Fig. S2) and swarming (Fig. S2) motilities of R20291, R20291 $\Delta$ WA, and R20291 $\Delta$ W were  
141 first analyzed at 24 h and 48 h post-inoculation, respectively. The diameter of the swimming halo  
142 of R20291 $\Delta$ WA increased by 27.2% ( $p < 0.05$ ), while that of R20291 $\Delta$ W decreased by 58.4% ( $p$   
143  $< 0.05$ ) compared to that of R20291. Next, we examined the motility of the complementation  
144 strains (Fig. 2B; Fig. S2), and similar results were obtained among R20291-E, R20291 $\Delta$ WA-E  
145 (with the swimming halo increased by 74.8%,  $p < 0.05$ ), and R20291 $\Delta$ W-E (with the swimming  
146 halo decreased by 59.2%,  $p < 0.05$ ) (Fig. 2B). No significant difference was detected between  
147 complementation strain R20291 $\Delta$ WA-WA, R20291 $\Delta$ WA-W, R20291 $\Delta$ W-W, and the parent  
148 strain R20291-E except R20291 $\Delta$ WA-A which decreased by 52.0% ( $p < 0.05$ ) in swimming  
149 halo (Fig. 2B). The swarming (48 h) and swimming (24 h) motilities analyzed on agar plates  
150 were shown in Fig. S2.

151 The effects of *fliW* and *fliW-csrA* deletions on *C. difficile* biofilm formation were also  
152 analyzed. In comparison with R20291, the biofilm formation of R20291 $\Delta$ W increased by 49.5%  
153 ( $p < 0.01$ ), and no significant difference in biofilm formation was detected in R20291 $\Delta$ WA (Fig.  
154 2C). The biofilm formation of R20291 $\Delta$ W-E increased 1.12 fold ( $p < 0.001$ ) and R20291 $\Delta$ WA-  
155 A increased by 79.9% ( $p < 0.001$ ) compared to R20291-E (Fig. 2D). Meanwhile, the biofilm  
156 formation of R20291 $\Delta$ WA-WA and R20291 $\Delta$ WA-W decreased by 42.8% ( $p < 0.01$ ) and 25.2%  
157 ( $p < 0.05$ ), respectively.

158 Together, these data indicate that loss of FliW impairs *C. difficile* motility, and increases  
159 biofilm production. The decrease of motility and increase of biofilm production were also  
160 detected in R20291 $\Delta$ WA-A, which was largely restored by coexpressing *fliW* with *csrA* in

161 R20291 $\Delta$ WA (Fig. 2B; Fig. 2D), indicating that *fliW* works together with *csrA* to regulate  
162 bacterial motility and biofilm production.

### 163 **Effects of *fliW* and *fliW-csrA* deletions on bacterial adherence *in vitro***

164 The ability of *C. difficile* vegetative cells to adhere to HCT-8 cells *in vitro* was analyzed. Fig. 2E  
165 showed that the mean adhesion number of R20291 was  $2.40 \pm 0.70$  bacteria / cell, while that of  
166 R20291 $\Delta$ W was  $7.17 \pm 0.61$ , which was 3.0 fold ( $P < 0.0001$ ) of R20291. No significant  
167 difference was detected between R20291 $\Delta$ WA and R20291. In the complementation strains, we  
168 detected a similar result which showed that the mean adhesion number of R20291 $\Delta$ W-E ( $6.17 \pm$   
169  $0.64$ ) was 3.20 fold ( $P < 0.0001$ ) of R20291-E ( $1.93 \pm 0.25$ ) (Fig. 2F). The adhesion ability of  
170 complementation strains nearly recovered to that of wild type strain except for R20291 $\Delta$ WA-A  
171 ( $7.13 \pm 0.66$ ,  $P < 0.0001$ ) which was 3.69 fold of R20291-E in the mean adhesion number (Fig.  
172 2F).

173 To visualize the adhesion of *C. difficile* to HCT-8 cells, the *C. difficile* vegetative cells were  
174 labeled with the chemical 5(6)-CFDA. Fig. 2G and 2H showed that the fluorescence intensity of  
175 R20291 $\Delta$ W was 3.50 fold ( $P < 0.0001$ ) of that in R20291, and the fluorescence intensity of  
176 R20291 $\Delta$ W-E was 2.36 fold ( $P < 0.001$ ) and R20291 $\Delta$ WA-A was 4.08 fold ( $P < 0.0001$ ) of that  
177 in R20291-E, respectively, which is consistent with the results showed in the Fig. 2E and 2F.  
178 Meanwhile, the adherence of *C. difficile* to HCT-8 cells was also visualized by fluorescence  
179 microscopy (Fig. S3).

180 Our data showed that FliW negatively affects bacterial adherence. CsrA complementation in  
181 R20291 $\Delta$ WA increased adherence, while the phenotype change can be recovered partially when  
182 *fliW* was coexpressed with *csrA* in R20291 $\Delta$ WA, suggesting that *fliW* works together with *csrA*  
183 to regulate bacterial adherence. The results from bacterial adherence analysis were consistent



184 with biofilm production analysis indicating the close relation between biofilm production and  
185 adherence in *C. difficile*.

### 186 **Effects of deletion and overexpression of *fliW* and *fliW-csrA* on *fliC* expression**

187 In *B. subtilis*, FliW interacts with CsrA to regulate *hag* (a homolog of *fliC*) expression. We  
188 reasoned that FliW and CsrA would also regulate *fliC* expression in *C. difficile*. As shown in Fig.  
189 3A, the transcription of *fliC* in R20291 $\Delta$ WA increased 1.12 fold ( $p < 0.05$ ), while the *fliW*  
190 deletion impaired the *fliC* transcription slightly while no significant difference. Fig. 3B showed  
191 the production of FliC in R20291 $\Delta$ W dramatically decreased (10.4 fold reduction,  $p < 0.001$ ),  
192 while that of R20291 $\Delta$ WA increased significantly (increased by 27.5%,  $p < 0.05$ ). To further  
193 determine the role of the single gene *csrA* on FliC synthesis, the *csrA* and *fliW* were  
194 complemented into R20291 $\Delta$ WA or overexpressed in R20291, respectively. Results showed that  
195 the significant difference of *fliC* transcription could only be detected in R20291 $\Delta$ WA-E  
196 (increased by 32.3%,  $p < 0.05$ ) (Fig. 3C) and R20291-W (increased by 69.8%) compared to  
197 R20291-E (Fig. 3E). Interestingly, the FliC production of R20291 $\Delta$ WA-A was 4.2 fold ( $p <$   
198 0.001) of that in R20291-E, while that of R20291 $\Delta$ WA-WA only decreased by 14.3% ( $p < 0.05$ )  
199 and no significant difference of FliC production in R20291 $\Delta$ WA-W was detected (Fig. 3D). As  
200 shown in Fig. 3E and 3F, the *fliC* transcription of R20291-A was not affected compared to  
201 R20291-E, but the FliC production in R20291-A decreased 5.3 fold ( $p < 0.0001$ ). The decrease  
202 of FliC production in R20291-A can be partially recovered when *fliW* was coexpressed with *csrA*  
203 (R20291-WA decreased by 16.2%,  $p < 0.05$ ).

204 Collectively, our data indicate that CsrA negatively modulates *fliC* expression post-  
205 transcriptionally and FliW works against CsrA to regulate *fliC* expression possibly through  
206 inhibiting CsrA-mediated negative post-transcriptional regulation.

## 207 **Effects of *fliW* and *fliW-csrA* deletions on toxin expression**

208 It has been reported that the expression of *csrA* could affect toxin expression in *C. difficile* (20).  
209 To evaluate the effects of *fliW* and *fliW-csrA* deletions on toxin production, the supernatants of *C.*  
210 *difficile* cultures were collected at 24 and 48 h post-inoculation, and the toxin concentration was  
211 determined by ELISA. Fig. 4A showed that the TcdA concentration of R20291 $\Delta$ WA decreased  
212 by 28.6% ( $P < 0.05$ ), while R20291 $\Delta$ W increased by 65.1% ( $P < 0.01$ ) compared to R20291 at  
213 24 h post-inoculation. However, after 48 h incubation, no significant difference was detected. In  
214 Fig. 4B, TcdB concentration of R20291 $\Delta$ WA decreased by 26.4% ( $P < 0.05$ ) at 24 h post-  
215 inoculation, while that of R20291 $\Delta$ W increased by 93.6% ( $P < 0.01$ ) at 24 h and 33.0% ( $P <$   
216  $0.05$ ) at 48 h. Similar results were also detected in the complementation strains group (Fig. 4C  
217 and 4D). As shown in Fig. 4C and 4D, after 24 h post-inoculation, TcdA (Fig. 4C) concentration  
218 of R20291 $\Delta$ WA-E and R20291 $\Delta$ WA-W decreased by 33.0% ( $*P < 0.05$ ) and 47.7% ( $P < 0.01$ ),  
219 and TcdB (Fig. 4D) concentration of R20291 $\Delta$ WA-E and R20291 $\Delta$ WA-W decreased by 37.9%  
220 ( $P < 0.05$ ) and 31.3% ( $P < 0.05$ ), respectively. While TcdA concentration of R20291 $\Delta$ W-E,  
221 R20291 $\Delta$ WA-A, and R20291 $\Delta$ W-W increased by 83.1% ( $P < 0.01$ ), 64.7% ( $P < 0.05$ ), and 56.5%  
222 ( $P < 0.05$ ), respectively. Meanwhile, TcdB concentration of R20291 $\Delta$ W-E increased by 100.2%  
223 ( $P < 0.01$ ). At 48 h post-inoculation, though no significant difference in TcdA production was  
224 detected among different *C. difficile* strains, TcdB concentration of R20291 $\Delta$ WA-A increased by  
225 28.5% ( $P < 0.05$ ) compared to R20291-E.

226 To analyze the transcription of *tcdA* and *tcdB* in the complementation strains, RT-qPCR was  
227 performed. As shown in Fig. 4E and 4D, the transcription of *tcdA* and *tcdB* of R20291 $\Delta$ WA-E  
228 and R20291 $\Delta$ WA-W decreased significantly ( $P < 0.05$ ), while that of R20291 $\Delta$ W-E increased  
229 significantly ( $P < 0.05$ ). Interestingly, the *tcdA* transcription of R20291 $\Delta$ WA-A also showed a

230 significant increase ( $P < 0.05$ ) compared to the wild type strain. Our data indicate that FliW  
231 negatively regulates toxin expression, while CsrA plays a positive regulation role in toxin  
232 expression.

### 233 **Effects of *fliW* and *fliW-csrA* deletions on sporulation and germination**

234 To assay the sporulation ratio of *C. difficile* strains, R20291, R20291 $\Delta$ WA, and R20291 $\Delta$ W  
235 were cultured in Clospore media for 48 and 96 h, respectively. Results (Fig. S4A) showed that  
236 no significant difference in the sporulation ratio was detected between the wild type strain and  
237 the mutants. The germination ratio of *C. difficile* spores was evaluated as well. Purified spores of  
238 R20291, R20291 $\Delta$ WA, and R20291 $\Delta$ W were incubated in the germination buffer supplemented  
239 with taurocholic acid (TA). As shown in Fig. S4B, there was no significant difference in the  
240 germination ratio between the wild type strain and the mutants.

### 241 **Evaluation of *fliW* and *fliW-csrA* deletions on bacterial virulence in the mouse model of** 242 **CDI**

243 To evaluate the effects of *fliW* and *fliW-csrA* deletions on *C. difficile* virulence *in vivo*, the mouse  
244 model of CDI was used. Thirty mice (n=10 per group) were orally challenged with R20291,  
245 R20291 $\Delta$ WA, or R20291 $\Delta$ W spores ( $1 \times 10^6$  spores / mouse) after antibiotic treatment. As  
246 shown in Fig. 5A, the R20291 $\Delta$ W infection group lost more weight at post challenge days 1 ( $P <$   
247  $0.05$ ) and the R20291 $\Delta$ WA infection group lost less weight at post challenge days 3 ( $P < 0.05$ )  
248 compared to the R20291 infection group. Fig. 5B showed that 60% of mice succumbed to severe  
249 disease within 4 days in the R20291 $\Delta$ W infection group and 20% in the R20291 $\Delta$ WA infection  
250 group compared to 50% mortality in the R20291 infection group (no significant difference with  
251 log-rank analysis). Meanwhile, 100% of mice developed diarrhea in both the R20291 $\Delta$ W and  
252 R20291 infection groups versus 80% in the R20291 $\Delta$ WA infection group at post challenge days

253 2 (Fig. 5C). As shown in Fig. 5D, the CFU of the R20291 $\Delta$ W infection group increased in the  
254 fecal shedding samples at post challenge days 1 and 2 ( $P < 0.05$ ), while the CFU of the  
255 R20291 $\Delta$ WA infection group decreased at post challenge days 1, 5, and 6 ( $P < 0.05$ ) compared  
256 to the R20291 infection group.

257 To evaluate the toxin level in the gut, the concentration of TcdA and TcdB in the feces was  
258 measured. In comparison with the R20291 infection group, the TcdA of the R20291 $\Delta$ W infection  
259 group increased significantly at post challenge days 1 ( $P < 0.05$ ), 2 ( $P < 0.05$ ), 3 ( $P < 0.01$ ), and  
260 5 ( $P < 0.05$ ) (Fig. 5E). While the TcdA of the R20291 $\Delta$ WA infection group was decreased  
261 significantly at post challenge days 1 ( $P < 0.05$ ) and 4 ( $P < 0.05$ ) (Fig. 5E). As shown in Fig. 5F,  
262 the TcdB concentration of the R20291 $\Delta$ W infection group decreased significantly at post  
263 challenge days 1 ( $P < 0.05$ ), 2 ( $P < 0.05$ ), and 3 ( $P < 0.05$ ), and that of the R20291 $\Delta$ WA  
264 increased significantly at post challenge days 1 ( $P < 0.05$ ), 2 ( $P < 0.01$ ), and 3 ( $P < 0.01$ ). Taken  
265 together, our results indicate that the FliW defect increases R20291 pathogenicity *in vivo*, while  
266 the *fliW-csrA* codeletion impairs R20291 pathogenicity.

## 267 **DISCUSSION**

268 In this study, we sought to characterize the impacts of FliW, CsrA, and FliC on *C. difficile*  
269 pathogenicity. Our data suggest that CsrA negatively modulates *fliC* expression post-  
270 transcriptionally and FliW affects *fliC* expression possibly through inhibiting CsrA-mediated  
271 negative post-transcriptional regulation. Our data also indicate that FliW negatively affects *C.*  
272 *difficile* pathogenicity possibly by antagonizing CsrA *in vivo*. Based on our current pleiotropic  
273 phenotype analysis, a similar partner-switching mechanism “FliW-CsrA-*fliC*/FliC” is predicted  
274 in *C. difficile*, though more direct experimental data are needed to uncover the molecular  
275 interactions of CsrA, FliW, and *fliC*/FliC in *C. difficile* (Fig. S5).

276 It has been reported that overexpression of the *csrA* gene could result in flagella defects,  
277 poor motility, and increased toxin production and adhesion in *C. difficile* 630 $\Delta$ erm (20). We  
278 found that *fliW* and *csrA* genes are broadly found in the *C. difficile* genomes, among them 10  
279 different *C. difficile* strains from ribotype 106 (RT106), RT027, RT001, RT078, RT009, RT012,  
280 RT046, and RT017 were selected and compared to R20291 (Table S2). CsrA and FliW widely  
281 exist in *C. difficile*, even in the *C. difficile* strains without flagellar like *C. difficile* M120 (28),  
282 indicating a potentially important role of FliW-CsrA in *C. difficile*. Interestingly, while there is  
283 no flagellar in *C. difficile* M120, but 6 flagellar structure genes (*fliS*, *fliN*, *flgK*, *flgL*, *fliC*, and  
284 *fliD*) are still found in the genome, which inspired us to explore the potential roles of *fliW*, *csrA*,  
285 and *fliC* in *C. difficile* by deleting or overexpressing *fliW*, *csrA*, and *fliW-csrA* genes. The  
286 important roles of CsrA in flagellin synthesis and flagellin homeostasis have been reported (17-  
287 20). A previous study had shown that the overexpression of the *csrA* gene can cause a dramatic  
288 motility reduction and a significant Hag decrease, suggesting that CsrA represses the Hag  
289 expression (17). FliW (the first protein regulator of CsrA activity) deletion abolished the *B.*  
290 *subtilis* swarming and swimming motility and decreased the number of flagella and flagellar  
291 length (18, 29). In this study, we obtained similar results that FliW defect impaired R20291  
292 motility significantly (Fig. 2A) and increased biofilm formation (Fig. 2C and 2D). Interestingly,  
293 the *csrA* gene complementation in R20291 $\Delta$ WA dramatically suppressed bacterial motility and  
294 showed a similar result to R20291 $\Delta$ W. Inversely, the *fliW-csrA* codeletion increased R20291  
295 motility. Meanwhile, no significant difference was detected between R20291 $\Delta$ WA-W and  
296 R20291 $\Delta$ WA, but there was a significant change between R20291 $\Delta$ WA-W and R20291-E,  
297 indicating that CsrA can suppress *C. difficile* motility and increase biofilm production, while  
298 FliW needs to work together with *csrA* to regulate bacteria motility and biofilm formation.

299 The partner-switching mechanism “Hag-FliW-CsrA” on flagellin synthesis was elucidated  
300 in *B. subtilis* and the intracellular concentration of the flagellar filament protein Hag is restricted  
301 tightly by the Hag-FliW-CsrA system (18). To investigate whether FliW and CsrA coregulate the  
302 *fliC* expression in *C. difficile*, we evaluated both the transcriptional and translational expression  
303 level of *fliC* gene. Our data (Fig. 3) showed that the *fliW* deletion resulted in a 10.4 fold decrease  
304 of FliC accumulation, while the *fliW-csrA* codeletion increased FliC production, indicating that  
305 CsrA could suppress the *fliC* translation and FliW works against CsrA to regulate FliC  
306 production. In *csrA*, *fliW*, and *fliW-csrA* overexpression experimental groups, we found that the  
307 *csrA* overexpression dramatically decreased FliC production (5.3 fold reduction) and the  
308 reduction of FliC production in R20291-A can be partially recovered when *fliW-csrA* was  
309 coexpressed. The FliW complementation in R20291 $\Delta$ WA didn't affect FliC production, but the  
310 *fliW* overexpression in R20291 increased FliC production. Taken together, our data suggest that  
311 CsrA negatively modulates *fliC* expression post-transcriptionally and FliW works against CsrA  
312 to regulate *fliC* expression through inhibiting CsrA-mediated negative post-transcriptional  
313 regulation, indicating a similar partner-switching mechanism “FliW-CsrA-FliC” in *C. difficile*  
314 (Fig. S5). In *B. subtilis*, two CsrA binding sites (BS1: A51 to A55; BS2: C75 to G82) were  
315 identified in the *hag* leader of the mRNA (17). Based on the *hag* 5' untranslated region (5'-UTR)  
316 sequence and CsrA conserved binding sequence, a 91 bp 5'-UTR structure with two potential  
317 CsrA binding sites (**BS1**: 5'-TGACAAGGATGT-3', **BS2**: 5'-CTAAGGAGGG-3') of *fliC* gene  
318 was predicted (Fig. S6) (30). Recently, it was also reported that cytoplasmic Hag levels play a  
319 central role in maintaining proper intracellular architecture, and the Hag-FliW-CsrA<sup>dimer</sup> system  
320 works at nearly 1:1:1 stoichiometry(19). Further studies on the exquisite interactions of CsrA,  
321 FliW, and *fliC*/FliC in *C. difficile* are still needed.

322 Flagella play multiple roles in bacterial motility, colonization, growth, toxin production, and  
323 survival optimization (21, 31, 32). Recently, several papers have reported that the flagellar genes  
324 can affect toxin expression in *C. difficile*, but results from different research groups were  
325 controversial (21-23). It was hypothesized that the regulation of the flagellar genes on toxin  
326 expression could be caused by the direct change or loss of flagellar genes (such as *fliC* gene  
327 deletion) rather than loss of the functional flagella (21). Future study about *fliC* deletion in M120  
328 will be very interesting and will further address the *fliC* gene function in *C. difficile* as there is no  
329 flagellar in RT078 strains. In our study, our data indicate that CsrA negatively modulates *fliC*  
330 expression and also plays a positive regulation in toxin expression. Inversely, FliW works  
331 against CsrA to regulate *fliC* expression which can negatively regulate toxin production. While  
332 studies of flagellar effects on motility and toxin production in *C. difficile* from different groups  
333 were controversial, the role of the flagella in *C. difficile* pathogenicity can not be overlooked.  
334 Dingle et. al (33) and Baban et. al (23) both showed higher mortality of the *fliC* mutant in the  
335 animal model of CDI compared to the wild type strains. Our study showed results similar to the  
336 published data suggesting that R20291 $\Delta$ W whose FilC production was dramatically suppressed  
337 exhibited higher fatality, while R20291 $\Delta$ WA showed a decreased pathogenicity compared to  
338 R20291 (Fig. 5). In 2014, Barketi et al. (24) examined the pleiotropic roles of the *fliC* gene in  
339 R20291 during colonization in mice. Interestingly, the transcription of *fliW* and *csrA* in the *fliC*  
340 mutant was 2.03 fold and 4.36 fold, respectively, of that in R20291 *in vivo* experiment (24),  
341 which further corroborated that there is a coregulation among *fliC*, *fliW*, and *csrA*. Surprisingly,  
342 transcription of *treA*, a trehalose-6-phosphate hydrolase, increased 177.63 fold (24). Recently,  
343 Collins et al. (34) hypothesized that dietary trehalose can contribute to the virulence of epidemic  
344 *C. difficile*. The relationship of FliW, CsrA, FliC, and trehalose metabolism is another

345 interesting question in *C. difficile* and some other carbon metabolism affected by the *fliC*  
346 mutation could also facilitate *C. difficile* pathogenesis *in vivo*. Previous studies have also  
347 highlighted that the flagella of *C. difficile* play an important role in toxin production, biofilm  
348 formation, and bacterial adherence to the host (22, 23, 25, 33, 35). In this study, we showed that  
349 the FliW defect led to a significant motility decrease, while the biofilm, adhesion, and toxin  
350 production increased significantly. Inversely, R20291 $\Delta$ WA-W, which can imitate the *csrA* gene  
351 deletion, showed an increase in motility and a decrease in biofilm formation, toxin production,  
352 and adhesion (Fig. 2, Fig. S2, and Fig. S3).

353 In conclusion, we characterized the function of FliW and CsrA and showed the pleiotropic  
354 functions of FliW and CsrA in R20291. Our data suggest that *fliW* and *csrA* play important roles  
355 in flagellin (FliC) synthesis which could contribute to *C. difficile* pathogenicity. Currently, *in*  
356 *vitro* study of the interactions of CsrA, FliW, and *fliC*/FliC in *C. difficile* is underway in our  
357 group.

## 358 **EXPERIMENTAL PROCEDURES**

359 **Bacteria, plasmids, and culture conditions** Table 1 lists the strains and plasmids used in this  
360 study. *C. difficile* strains were cultured in BHIS media (brain heart infusion broth supplemented  
361 with 0.5% yeast extract and 0.1% L-cysteine, and 1.5% agar for agar plates) at 37 °C in an  
362 anaerobic chamber (90% N<sub>2</sub>, 5% H<sub>2</sub>, 5% CO<sub>2</sub>). For spores preparation, *C. difficile* strains were  
363 cultured in Clospore media and purified as described earlier (36). *Escherichia coli* DH5 $\alpha$  and *E.*  
364 *coli* HB101/pRK24 were grown aerobically at 37 °C in LB media (1% tryptone, 0.5% yeast  
365 extract, 1% NaCl). *E. coli* DH5 $\alpha$  was used as a cloning host and *E. coli* HB101/pRK24 was used  
366 as a conjugation donor host. Antibiotics were added when needed: for *E. coli*, 15  $\mu$ g/ml



367 chloramphenicol; for *C. difficile*, 15 µg/ml thiamphenicol, 250 µg/ml D-cycloserine, 50 µg/ml  
368 kanamycin, 8 µg/ml cefoxitin, and 500 ng/ml anhydrotetracycline.

### 369 **DNA manipulations and chemicals**

370 DNA manipulations were carried out according to standard techniques (37). Plasmids were  
371 conjugated into *C. difficile* as described earlier (38). The DNA markers, protein markers, PCR  
372 product purification kit, DNA gel extraction kit, restriction enzymes, cDNA synthesis kit, and  
373 SYBR Green RT-qPCR kit were purchased from Thermo Fisher Scientific (Waltham, USA).  
374 PCRs were performed with the high-fidelity DNA polymerase NEB Q5 Master Mix, and PCR  
375 products were assembled into target plasmids with NEBuilder HIFI DNA Assembly Master Mix  
376 (New England, UK). Primers (Supporting Information Table S1) were purchased from IDT  
377 (Coralville, USA). All chemicals were purchased from Sigma (St. Louis, USA) unless those  
378 stated otherwise.

### 379 **Construction of R20291 mutant strains of gene deletion, complementation, and** 380 **overexpression**

381 The Cas12a (AsCpfI) based gene deletion plasmid pDL-1 was constructed and used for *C.*  
382 *difficile* gene deletion (26). The target sgRNA was designed with an available website tool  
383 (<http://big.hanyang.ac.kr/cindel/>) and the off-target prediction was analyzed on the Cas-OFFinder  
384 website (<http://www.rgenome.net/cas-offinder/>). The sgRNA, up and down homologous arms  
385 were assembled into pDL-1. Two target sgRNAs for one gene deletion were selected and used  
386 for gene deletion plasmid construction in *C. difficile*, respectively. Briefly, the gene deletion  
387 plasmid was constructed in the cloning host *E. coli* DH5α and was transformed into the donor  
388 host *E. coli* HB101/pRK24, and subsequently was conjugated into R20291. Potential successful  
389 transconjugants were selected with selective antibiotic BHIS-TKC plates (15 µg/ml

390 thiamphenicol, 50 µg/ml kanamycin, 8 µg/ml cefoxitin). The transconjugants were cultured in  
391 BHIS-Tm broth (15 µg/ml thiamphenicol) to log phase, then the subsequent cultures were plated  
392 on the inducing plates (BHIS-Tm-ATc: 15 µg/ml thiamphenicol and 500 ng/ml  
393 anhydrotetracycline). After 24 - 48 h of incubation, 20 - 40 colonies were used as templates for  
394 colony PCR test with check primers for correct gene deletion colony isolation. The correct gene  
395 deletion colony was sub-cultured into BHIS broth without antibiotics and was passaged several  
396 times to cure the deletion plasmid, then the cultures were plated on BHIS plates and subsequent  
397 colonies were replica plated on BHIS-Tm plates to isolate pure clean gene deletion mutants  
398 (R20291ΔW and R20291ΔWA). The genome of R20291ΔW and R20291ΔWA were isolated  
399 and used as templates for the PCR test with check primers, and the PCR products were  
400 sequenced to confirm the correct gene deletion.

401 The *fliW* (396 bp) (primers 3-F/R), *csrA* (213 bp) (primers 4-F/R), and *fliW-csrA* (599 bp)  
402 (primers 5-F/R) genes were amplified and assembled into *SacI-BamHI* digested pMTL84153  
403 plasmid, yielding the complementation plasmid pMTL84153-*fliW*, pMTL84153-*csrA*, and  
404 pMTL84153-*fliW-csrA*, and were subsequently conjugated into R20291ΔWA, R20291ΔW, and  
405 R20291 yielding complemeantation strain R20291ΔWA/pMTL84153-*fliW* (referred as  
406 R20291ΔWA-W), R20291ΔWA/pMTL84153-*csrA* (R20291ΔWA-A),  
407 R20291ΔWA/pMTL84153-*fliW-csrA* (R20291ΔWA-WA), R20291ΔW/pMTL84153-*fliW*  
408 (R20291ΔW-W) and overexpression strain R20291/pMTL84153-*fliW* (R20291-W),  
409 R20291/pMTL84153-*csrA* (R20291-A), R20291/pMTL84153-*fliW-csrA* (R20291-WA).

410 **Growth profile, motility, and biofilm assay**

411 *C. difficile* strains were incubated to an optical density of OD<sub>600</sub> of 0.8 in BHIS media and were  
412 diluted to an OD<sub>600</sub> of 0.2. Then, 1% of the culture was inoculated into fresh BHIS, followed by  
413 measuring OD<sub>600</sub> for 32 h.

414 To examine the effect of *fliW* and *fliW-csrA* deletion on *C. difficile* motility, R20291,  
415 R20291ΔWA, and R20291ΔW were cultured to an OD<sub>600</sub> of 0.8. For swimming analysis, 2 μl of  
416 *C. difficile* culture was penetrated into soft BHIS agar (0.175%) plates, meanwhile, 2 μl of  
417 culture was dropped onto 0.3% BHIS agar plates for swarming analysis. The swimming assay  
418 plates were incubated for 24 h and the swarming plates were incubated for 48 h, respectively.

419 For biofilm formation analysis, wild type and mutant *C. difficile* R20291 strains were  
420 cultured to an OD<sub>600</sub> of 0.8, and 1% of *C. difficile* cultures were inoculated into Reinforced  
421 Clostridial Medium (RCM) with 8 well repeats in a 96-well plate and incubated in the anaerobic  
422 chamber at 37 °C for 48 h. Biofilm formation was analyzed by crystal violet dye. Briefly, *C.*  
423 *difficile* cultures were removed by pipette carefully. Then 100 μl of 2.5% glutaraldehyde was  
424 added into the well to fix the bottom biofilm, and the plate was kept at room temperature for 30  
425 min. Next, the wells were washed with PBS 3 times and dyed with 0.25% (w/v) crystal violet for  
426 10 min. The crystal violet solution was removed, and the wells were washed 5 times with PBS,  
427 followed by the addition of acetone into wells to dissolve the crystal violet of the cells. The  
428 dissolved solution was further diluted with ethanol 2 - 4 times and biomass was determined at  
429 OD<sub>570</sub>.

#### 430 **Adherence of *C. difficile* vegetative cells to HCT-8 cells**

431 *C. difficile* adhesion ability was evaluated with HCT-8 cells (ATCC CCL-244) (39). Briefly,  
432 HCT-8 cells were grown to 95% confluence ( $2 \times 10^5$ /well) in a 24-well plate and then moved into  
433 the anaerobic chamber, followed by infecting with  $6 \times 10^6$  of log phase of *C. difficile* vegetative

434 cells at a multiplicity of infection (MOI) of 30:1. The plate was cultured at 37 °C for 30 min.  
435 After incubation, the infected cells were washed with 300 µl of PBS 3 times, and then suspended  
436 in RPMI media with trypsin and plated on BHIS agar plates to enumerate the adhered *C. difficile*  
437 cells. The adhesion ability of *C. difficile* to HCT-8 cells was calculated as follows: CFU of  
438 adhered bacteria / Total cell numbers.

439 To visualize the adherence of *C. difficile* to HCT-8 cells, *C. difficile* vegetative cells were  
440 labeled with the chemical 5(6)-CFDA (5-(and -6)-Carboxyfluorescein diacetate) (40). Briefly, *C.*  
441 *difficile* strains were cultured to an OD<sub>600</sub> of 0.8, then washed with PBS 3 times and resuspended  
442 in fresh BHIS supplemented with 50 mM 5(6)-CFDA, followed by incubation at 37 °C for 30  
443 min in the anaerobic chamber. After post-incubation, the labeled *C. difficile* cells were collected  
444 and washed with PBS 3 times, and then resuspended in RPMI medium. Afterward, the labeled *C.*  
445 *difficile* cells were used for the infection experiment as described above. After 30 min post-  
446 infection, the fluorescence of each well was scanned by the Multi-Mode Reader (excitation, 485  
447 nm; emission, 528 nm), the relative fluorescence unit (RFU) was recorded as F0. Following, the  
448 plates were washed with PBS 3 times to remove unbound *C. difficile* cells, then the plates were  
449 scanned and the RFU was recorded as F1. The adhesion ratio was calculated as follows: F1/F0.  
450 After scanning, the infected cell plates were further detected by the fluorescence microscope.

#### 451 ***fliC* expression assay**

452 For *fliC* transcription analysis, 2 ml of 24 h post inoculated *C. difficile* cultures were centrifuged  
453 at 4 °C, 12000×g for 5 min, respectively. Then, the total RNA of different strains was extracted  
454 with TRIzol reagent. The transcription of *fliC* was measured by RT-qPCR with primers Q-*fliC*-  
455 F/R. All RT-qPCRs were repeated in triplicate, independently. Data were analyzed by the  
456 comparative CT ( $2^{-\Delta\Delta CT}$ ) method with 16s rRNA as a control.

457 To analyze the FliC protein level, *C. difficile* cell lysates from overnight cultures were used  
458 for Western blot analysis. Briefly, overnight *C. difficile* cultures were collected and washed 3  
459 times with PBS and then resuspended in 5 ml of distilled water. The suspensions were lysed with  
460 TissueLyser LT (Qiagen), followed centrifuged at 4°C, 25000×g for 1h. The final pellets were  
461 resuspended in 30 µl of PBS and the total protein concentration was measured by using a BCA  
462 protein assay (Thermo Scientific, Suwanee, GA). Protein extracts were subjected to 10% SDS-  
463 PAGE. Sigma A protein (SigA) was used as a loading control protein in SDS-PAGE. FliC and  
464 SigA proteins on the gel were detected with anti-FliC and anti-SigA primary antibody (1:1000)  
465 and horseradish peroxidase-conjugated secondary antibody goat anti-mouse (Cat: ab97023, IgG,  
466 1:3000, Abcam, Cambridge, MA) by Western blot, respectively. Anti-FliC antibody used in the  
467 Western blot analysis is an anti-FliCD serum, generated in the lab. FliCD is a fusion protein  
468 containing *C.difficile* FliC and FliD (41).

#### 469 **Toxin expression assay**

470 To evaluate toxin expression in *C. difficile* strains, 10 ml of *C. difficile* cultures were collected at  
471 24 and 48 h post incubation. The cultures were adjusted to the same density with fresh BHIS.  
472 Then the collected *C. difficile* cultures were centrifuged at 4 °C, 8000×g for 15 min, filtered with  
473 0.22 µm filters, and used for ELISA. Anti-TcdA (PCG4.1, Novus Biologicals, USA) and anti-  
474 TcdB (AI, Gene Tex, USA) were used as coating antibodies for ELISA, and HRP-Chicken anti-  
475 TcdA and HRP-Chicken anti-TcdB (Gallus Immunotech, USA) were used as detection  
476 antibodies.

477 For toxin transcription analysis, 2 ml of 24 and 48 h post inoculated *C. difficile* cultures  
478 were centrifuged at 4 °C, 12000×g for 5 min, respectively. Next, the total RNA of different  
479 strains was extracted with TRIzol reagent. The transcription of *tcdA* and *tcdB* was measured by

480 RT-qPCR with primers Q-*tcdA*-F/R and Q-*tcdB*-F/R, respectively. All RT-qPCRs were repeated  
481 in triplicate, independently. Data were analyzed by using the comparative CT ( $2^{-\Delta\Delta CT}$ ) method  
482 with 16s rRNA as a control.

#### 483 **Germination and sporulation assay**

484 *C. difficile* germination and sporulation analysis were conducted as reported earlier (42). Briefly,  
485 for *C. difficile* sporulation analysis, *C. difficile* strains were cultured in Clospore media for 4 days.  
486 Afterward, the CFU of cultures from 48 and 96 h were counted on BHIS plates with 0.1% TA to  
487 detect sporulation ratio, respectively. The sporulation ratio was calculated as CFU (65 °C heated)  
488 / CFU (no heated). For *C. difficile* germination analysis, *C. difficile* spores were collected from  
489 2- week Clospore media cultured bacteria and purified with sucrose gradient layer (50%, 45%,  
490 35%, 25%, 10%). The heated purified spores were diluted to an OD<sub>600</sub> of 1.0 in the germination  
491 buffer [10 mM Tris (pH 7.5), 150 mM NaCl, 100 mM glycine, 10 mM taurocholic acid (TA)] to  
492 detect the germination ratio. The value of OD<sub>600</sub> was monitored immediately (0 min, t<sub>0</sub>), and was  
493 detected once every 2 min (t<sub>x</sub>) for 20 min at 37 °C. The germination ratio was calculated as  
494 OD<sub>600</sub> (t<sub>x</sub>) / OD<sub>600</sub> (T<sub>0</sub>). Spores in germination buffer without TA were used as the negative  
495 control.

#### 496 **Evaluation of R20291, R20291ΔWA, and R20291ΔW virulence in the mouse model of *C.***

#### 497 ***difficile* infection**

498 C57BL/6 female mice (6 weeks old) were ordered from Charles River Laboratories, Cambridge,  
499 MA. All studies were approved by the Institutional Animal Care and Use Committee of  
500 University of South Florida. The experimental design and antibiotic administration were  
501 conducted as described earlier (43). Briefly, 30 mice were divided into 3 groups in 6 cages.  
502 Group 1 mice were challenged with R20291 spores, group 2 mice with R20291ΔWA spores, and

503 group 3 mice with R20291ΔW spores, respectively. Mice were given an orally administered  
504 antibiotic cocktail (kanamycin 0.4 mg/ml, gentamicin 0.035 mg/ml, colistin 0.042 mg/ml,  
505 metronidazole 0.215 mg/ml, and vancomycin 0.045 mg/ml) in drinking water for 4 days. After 4  
506 days of antibiotic treatment, all mice were given autoclaved water for 2 days, followed by one  
507 dose of clindamycin (10 mg/kg, intraperitoneal route) 24 h before spores challenge (Day 0).  
508 After that, mice were orally gavaged with  $10^6$  of spores and monitored daily for a week for  
509 changes in weight, diarrhea, and mortality.

#### 510 **Evaluation of *C. difficile* spores and determination of toxin level in feces**

511 Fecal pellets from post infection day 0 to day 7 were collected and stored at -80 °C. To  
512 enumerate *C. difficile* numbers, feces were diluted with PBS at a final concentration of 0.1 g/ml,  
513 followed by adding 900 μl of absolute ethanol into 100 μl of the fecal solution, and kept at room  
514 temperature for 1 h to inactivate vegetative cells. Afterward, 200 μl of vegetative cells  
515 inactivated fecal solution from the same group and the same day was mixed. Then, fecal samples  
516 were serially diluted and plated on BHIS-CCT plates (250 μg/ml D-cycloserine, 8 μg/ml  
517 cefoxitin, 0.1% TA). After 48 h incubation, colonies were counted and expressed as CFU/g feces.  
518 To evaluate toxin titer in feces, 0.1 g/ml of the fecal solution was diluted two times with PBS,  
519 followed by examining TcdA and TCdB ELISA.

#### 520 **Statistical analysis**

521 The reported experiments were conducted in independent biological triplicates except for the  
522 animal experiment, and each sample was additionally taken in technical triplicates. Animal  
523 survivals were analyzed by Kaplan-Meier survival analysis and compared by the Log-Rank test.  
524 One-way analysis of variance (ANOVA) with post-hoc Tukey test was used for more than two

525 groups comparison. Results were expressed as mean  $\pm$  standard error of the mean. Differences  
526 were considered statistically significant if  $P < 0.05$  (\*).

## 527 **ACKNOWLEDGEMENTS**

528 This work was supported in part by the National Institutes of Health grants (R01-AI132711 and  
529 R01-AI149852). Authors thank Dr. Abraham L. Sonnenshein at Tufts University, Dr. Joseph  
530 Sorg at Texas A &M, and Dr. Daniel Kearns at Indiana University for the gifts *C. difficile*  
531 R20291, *E.coli* HB101/pRK24, and anti-SigA primary antibody, respectively. We thank Dr.  
532 Nigel Minton at the University of Nottingham for the gift plasmids pMTL84151 and  
533 pMTL83353. We also thank Jessica Bullock and Dr. Heather Danhof for their mindful revision  
534 and comments.

## 535 **REFERENCES**

- 536 1. Lawson PA, Citron DM, Tyrrell KL, Finegold SM. 2016. Reclassification of *Clostridium*  
537 *difficile* as *Clostridioides difficile* (Hall and O'Toole 1935) Prevot 1938. *Anaerobe* 40:95-  
538 9.
- 539 2. Oren A, Garrity GM. 2018. Notification of changes in taxonomic opinion previously  
540 published outside the IJSEM. *International Journal of Systematic and Evolutionary*  
541 *Microbiology* 68:2137-2138.
- 542 3. Sebaihia M, Wren BW, Mullany P, Fairweather NF, Minton N, Stabler R, Thomson NR,  
543 Roberts AP, Cerdeno-Tarraga AM, Wang HW, Holden MTG, Wright A, Churcher C,  
544 Quail MA, Baker S, Bason N, Brooks K, Chillingworth T, Cronin A, Davis P, Dowd L,  
545 Fraser A, Feltwell T, Hance Z, Holroyd S, Jagels K, Moule S, Mungall K, Price C,  
546 Rabinowitsch E, Sharp S, Simmonds M, Stevens K, Unwin L, Whithead S, Dupuy B,



- 547 Dougan G, Barrell B, Parkhill J. 2006. The multidrug-resistant human pathogen  
548 *Clostridium difficile* has a highly mobile, mosaic genome. *Nature Genetics* 38:779-786.
- 549 4. Lessa FC, Gould CV, McDonald LC. 2012. Current Status of *Clostridium difficile*  
550 Infection Epidemiology. *Clinical Infectious Diseases* 55:S65-S70.
- 551 5. Lyras D, O'Connor JR, Howarth PM, Sambol SP, Carter GP, Phumoonna T, Poon R,  
552 Adams V, Vedantam G, Johnson S, Gerding DN, Rood JJ. 2009. Toxin B is essential for  
553 virulence of *Clostridium difficile*. *Nature* 458:1176-9.
- 554 6. Kuehne SA, Cartman ST, Heap JT, Kelly ML, Cockayne A, Minton NP. 2010. The role  
555 of toxin A and toxin B in *Clostridium difficile* infection. *Nature* 467:711-3.
- 556 7. Peniche AG, Savidge TC, Dann SM. 2013. Recent insights into *Clostridium difficile*  
557 pathogenesis. *Current Opinion in Infectious Diseases* 26:447-453.
- 558 8. Pessi G, Williams F, Hindle Z, Heurlier K, Holden MT, Camara M, Haas D, Williams P.  
559 2001. The global posttranscriptional regulator RsmA modulates production of virulence  
560 determinants and N-acylhomoserine lactones in *Pseudomonas aeruginosa*. *J Bacteriol*  
561 183:6676-83.
- 562 9. Morris ER, Hall G, Li C, Heeb S, Kulkarni RV, Lovelock L, Silistre H, Messina M,  
563 Camara M, Emsley J, Williams P, Searle MS. 2013. Structural rearrangement in an  
564 RsmA/CsrA ortholog of *Pseudomonas aeruginosa* creates a dimeric RNA-binding protein,  
565 RsmN. *Structure* 21:1659-71.
- 566 10. Ferreira MD, Nogales J, Farias GA, Olmedilla A, Sanjuan J, Gallegos MT. 2018.  
567 Multiple CsrA Proteins Control Key Virulence Traits in *Pseudomonas syringae* pv.  
568 tomato DC3000. *Mol Plant Microbe Interact* 31:525-536.

- 569 11. Karna SL, Sanjuan E, Esteve-Gassent MD, Miller CL, Maruskova M, Seshu J. 2011.  
570 CsrA modulates levels of lipoproteins and key regulators of gene expression critical for  
571 pathogenic mechanisms of *Borrelia burgdorferi*. *Infect Immun* 79:732-44.
- 572 12. Lawhon SD, Frye JG, Suyemoto M, Porwollik S, McClelland M, Altier C. 2003. Global  
573 regulation by CsrA in *Salmonella typhimurium*. *Mol Microbiol* 48:1633-45.
- 574 13. Timmermans J, Van Melderen L. 2010. Post-transcriptional global regulation by CsrA in  
575 bacteria. *Cell Mol Life Sci* 67:2897-908.
- 576 14. Lucchetti-Miganeh C, Burrowes E, Baysse C, Ermel G. 2008. The post-transcriptional  
577 regulator CsrA plays a central role in the adaptation of bacterial pathogens to different  
578 stages of infection in animal hosts. *Microbiology* 154:16-29.
- 579 15. Romeo T, Gong M, Liu MY, Brun-Zinkernagel AM. 1993. Identification and molecular  
580 characterization of *csrA*, a pleiotropic gene from *Escherichia coli* that affects glycogen  
581 biosynthesis, gluconeogenesis, cell size, and surface properties. *J Bacteriol* 175:4744-55.
- 582 16. Sorger-Domenigg T, Sonnleitner E, Kaberdin VR, Blasi U. 2007. Distinct and  
583 overlapping binding sites of *Pseudomonas aeruginosa* Hfq and RsmA proteins on the  
584 non-coding RNA RsmY. *Biochem Biophys Res Commun* 352:769-73.
- 585 17. Yakhnin H, Pandit P, Petty TJ, Baker CS, Romeo T, Babitzke P. 2007. CsrA of *Bacillus*  
586 *subtilis* regulates translation initiation of the gene encoding the flagellin protein (*hag*) by  
587 blocking ribosome binding. *Mol Microbiol* 64:1605-20.
- 588 18. Mukherjee S, Yakhnin H, Kysela D, Sokoloski J, Babitzke P, Kearns DB. 2011. CsrA-  
589 FliW interaction governs flagellin homeostasis and a checkpoint on flagellar  
590 morphogenesis in *Bacillus subtilis*. *Mol Microbiol* 82:447-61.

- 591 19. Oshiro RT, Rajendren S, Hundley HA, Kearns DB. 2019. Robust Stoichiometry of FliW-  
592 CsrA Governs Flagellin Homeostasis and Cytoplasmic Organization in *Bacillus subtilis*.  
593 *mBio* 10.
- 594 20. Gu H, Qi H, Chen S, Shi K, Wang H, Wang J. 2018. Carbon storage regulator CsrA plays  
595 important roles in multiple virulence-associated processes of *Clostridium difficile*.  
596 *Microb Pathog* 121:303-309.
- 597 21. Stevenson E, Minton NP, Kuehne SA. 2015. The role of flagella in *Clostridium difficile*  
598 pathogenicity. *Trends Microbiol* 23:275-82.
- 599 22. Aubry A, Hussack G, Chen W, KuoLee R, Twine SM, Fulton KM, Foote S, Carrillo CD,  
600 Tanha J, Logan SM. 2012. Modulation of toxin production by the flagellar regulon in  
601 *Clostridium difficile*. *Infect Immun* 80:3521-32.
- 602 23. Baban ST, Kuehne SA, Barketi-Klai A, Cartman ST, Kelly ML, Hardie KR, Kansau I,  
603 Collignon A, Minton NP. 2013. The role of flagella in *Clostridium difficile* pathogenesis:  
604 comparison between a non-epidemic and an epidemic strain. *PLoS One* 8:e73026.
- 605 24. Barketi-Klai A, Monot M, Hoys S, Lambert-Bordes S, Kuehne SA, Minton N, Collignon  
606 A, Dupuy B, Kansau I. 2014. The flagellin FliC of *Clostridium difficile* is responsible for  
607 pleiotropic gene regulation during in vivo infection. *PLoS One* 9:e96876.
- 608 25. Tasteyre A, Barc MC, Collignon A, Boureau H, Karjalainen T. 2001. Role of FliC and  
609 FliD flagellar proteins of *Clostridium difficile* in adherence and gut colonization. *Infect*  
610 *Immun* 69:7937-40.
- 611 26. Hong W, Zhang J, Cui G, Wang L, Wang Y. 2018. Multiplexed CRISPR-Cpf1-Mediated  
612 Genome Editing in *Clostridium difficile* toward the Understanding of Pathogenesis of *C.*  
613 *difficile* Infection. *ACS Synth Biol* 7:1588-1600.

- 614 27. Zhu D, Patabendige H, Tomlinson BR, Wang S, Hussain S, Flores D, He Y, Shaw LN,  
615 Sun X. 2021. Cwl0971, a novel peptidoglycan hydrolase, plays pleiotropic roles in  
616 *Clostridioides difficile* R20291. *Environ Microbiol* doi:10.1111/1462-2920.15529.
- 617 28. Stabler RA, He M, Dawson L, Martin M, Valiente E, Corton C, Lawley TD, Sebahia M,  
618 Quail MA, Rose G, Gerding DN, Gibert M, Popoff MR, Parkhill J, Dougan G, Wren BW.  
619 2009. Comparative genome and phenotypic analysis of *Clostridium difficile* 027 strains  
620 provides insight into the evolution of a hypervirulent bacterium. *Genome Biol* 10:R102.
- 621 29. Mukherjee S, Oshiro RT, Yakhnin H, Babitzke P, Kearns DB. 2016. FliW antagonizes  
622 CsrA RNA binding by a noncompetitive allosteric mechanism. *Proc Natl Acad Sci U S A*  
623 113:9870-5.
- 624 30. Dubey AK, Baker CS, Romeo T, Babitzke P. 2005. RNA sequence and secondary  
625 structure participate in high-affinity CsrA-RNA interaction. *RNA* 11:1579-87.
- 626 31. Harshey RM. 2003. Bacterial motility on a surface: many ways to a common goal. *Annu*  
627 *Rev Microbiol* 57:249-73.
- 628 32. Duan Q, Zhou M, Zhu L, Zhu G. 2013. Flagella and bacterial pathogenicity. *J Basic*  
629 *Microbiol* 53:1-8.
- 630 33. Dingle TC, Mulvey GL, Armstrong GD. 2011. Mutagenic analysis of the *Clostridium*  
631 *difficile* flagellar proteins, FliC and FliD, and their contribution to virulence in hamsters.  
632 *Infect Immun* 79:4061-7.
- 633 34. Collins J, Robinson C, Danhof H, Knetsch CW, van Leeuwen HC, Lawley TD, Auchtung  
634 JM, Britton RA. 2018. Dietary trehalose enhances virulence of epidemic *Clostridium*  
635 *difficile*. *Nature* 553:291-294.

- 636 35. Ethapa T, Leuzzi R, Ng YK, Baban ST, Adamo R, Kuehne SA, Scarselli M, Minton NP,  
637 Serruto D, Unnikrishnan M. 2013. Multiple factors modulate biofilm formation by the  
638 anaerobic pathogen *Clostridium difficile*. *J Bacteriol* 195:545-55.
- 639 36. Perez J, Springthorpe VS, Sattar SA. 2011. Clospore: A Liquid Medium for Producing  
640 High Titers of Semi-Purified Spores of *Clostridium difficile*. *Journal of Aoac*  
641 *International* 94:618-626.
- 642 37. Chong L. 2001. *Molecular cloning - A laboratory manual*, 3rd edition. *Science* 292:446-  
643 446.
- 644 38. Heap JT, Kuehne SA, Ehsaan M, Cartman ST, Cooksley CM, Scott JC, Minton NP. 2010.  
645 The Clostron: Mutagenesis in *Clostridium* refined and streamlined. *Journal of*  
646 *Microbiological Methods* 80:49-55.
- 647 39. Janvilisri T, Scaria J, Chang YF. 2010. Transcriptional profiling of *Clostridium difficile*  
648 and Caco-2 cells during infection. *J Infect Dis* 202:282-90.
- 649 40. Fuller ME, Streger SH, Rothmel RK, Mailloux BJ, Hall JA, Onstott TC, Fredrickson JK,  
650 Balkwill DL, DeFlaun MF. 2000. Development of a vital fluorescent staining method for  
651 monitoring bacterial transport in subsurface environments. *Appl Environ Microbiol*  
652 66:4486-96.
- 653 41. Wang Y, Wang S, Bouillaut L, Li C, Duan Z, Zhang K, Ju X, Tzipori S, Sonenshein AL,  
654 Sun X. 2018. Oral Immunization with Nontoxicogenic *Clostridium difficile* Strains  
655 Expressing Chimeric Fragments of TcdA and TcdB Elicits Protective Immunity against *C.*  
656 *difficile* Infection in Both Mice and Hamsters. *Infect Immun* 86.

- 657 42. Zhu D, Bullock J, He Y, Sun X. 2019. Cwp22, a novel peptidoglycan cross-linking  
658 enzyme, plays pleiotropic roles in *Clostridioides difficile*. *Environ Microbiol* 21:3076-  
659 3090.
- 660 43. Sun X, Wang H, Zhang Y, Chen K, Davis B, Feng H. 2011. Mouse relapse model of  
661 *Clostridium difficile* infection. *Infect Immun* 79:2856-64.
- 662 44. Williams DR, Young DI, Young M. 1990. Conjugative plasmid transfer from *Escherichia*  
663 *coli* to *Clostridium acetobutylicum*. *J Gen Microbiol* 136:819-26.
- 664 45. Stabler RA, He M, Dawson L, Martin M, Valiente E, Corton C, Lawley TD, Sebahia M,  
665 Quail MA, Rose G, Gerding DN, Gibert M, Popoff MR, Parkhill J, Dougan G, Wren BW.  
666 2009. Comparative genome and phenotypic analysis of *Clostridium difficile* 027 strains  
667 provides insight into the evolution of a hypervirulent bacterium. *Genome Biology* 10.
- 668 46. Heap JT, Pennington OJ, Cartman ST, Minton NP. 2009. A modular system for  
669 *Clostridium* shuttle plasmids. *J Microbiol Methods* 78:79-85.

670

## 671 TABLES

672 **Table 1. Bacteria and plasmids utilized in this study**

| Strains or plasmids         | Genotype or phenotype                 | Reference |
|-----------------------------|---------------------------------------|-----------|
| <b>Strains</b>              |                                       |           |
| <i>E. coli</i> DH5 $\alpha$ | Cloning host                          | NEB       |
| <i>E. coli</i> HB101/pRK24  | Conjugation donor                     | (44)      |
| <i>C. difficile</i> R20291  | Clinical isolate; ribotype 027        | (45)      |
| R20291 $\Delta$ W           | R20291 deleted <i>fliW</i> gene       | This work |
| R20291 $\Delta$ WA          | R20291 deleted <i>fliW-csrA</i> genes | This work |

|                       |                                                                  |           |
|-----------------------|------------------------------------------------------------------|-----------|
| R20291-E              | R20291 containing blank plasmid pMTL84153                        | This work |
| R20291 $\Delta$ W-E   | R20291 $\Delta$ W containing blank plasmid pMTL84153             | This work |
| R20291 $\Delta$ WA-E  | R20291 $\Delta$ WA containing blank plasmid pMTL84153            | This work |
| R20291 $\Delta$ W-W   | R20291 $\Delta$ W complemented with pMTL84153- <i>fliW</i>       | This work |
| R20291 $\Delta$ WA-WA | R20291 $\Delta$ WA complemented with pMTL84153- <i>fliW-csrA</i> | This work |
| R20291 $\Delta$ WA-W  | R20291 $\Delta$ WA complemented with pMTL84153- <i>fliW</i>      | This work |
| R20291 $\Delta$ WA-A  | R20291 $\Delta$ WA complemented with pMTL84153- <i>csrA</i>      | This work |
| R20291-W              | R20291 containing pMTL84153- <i>fliW</i>                         | This work |
| R20291-A              | R20291 containing pMTL84153- <i>csrA</i>                         | This work |
| R20291-WA             | R20291 containing pMTL84153- <i>fliW-csrA</i>                    | This work |

### Plasmids

|                             |                                             |           |
|-----------------------------|---------------------------------------------|-----------|
| pDL1                        | AsCpfI based gene deletion plasmid          | This work |
| pUC57-PsRNA                 | sRNA promoter template                      | This work |
| pDL1- <i>fliW</i>           | <i>fliW</i> gene deletion plasmid           | This work |
| pDL1- <i>csrA</i>           | <i>csrA</i> gene deletion plasmid           | This work |
| pDL1- <i>fliW-csrA</i>      | <i>fliW-csrA</i> gene deletion plasmid      | This work |
| pMTL84153                   | Complementation plasmid                     | (46)      |
| pMTL84153- <i>fliW-csrA</i> | pMTL84153 containing <i>fliW-csrA</i> genes | This work |
| pMTL84153- <i>fliW</i>      | pMTL84153 containing <i>fliW</i> gene       | This work |
| pMTL84153- <i>csrA</i>      | pMTL84153 containing <i>csrA</i> gene       | This work |

---

673

674

675

676

677

678

679

680

681

682

683

684

685

686

687

688

689

690 **FIGURES**



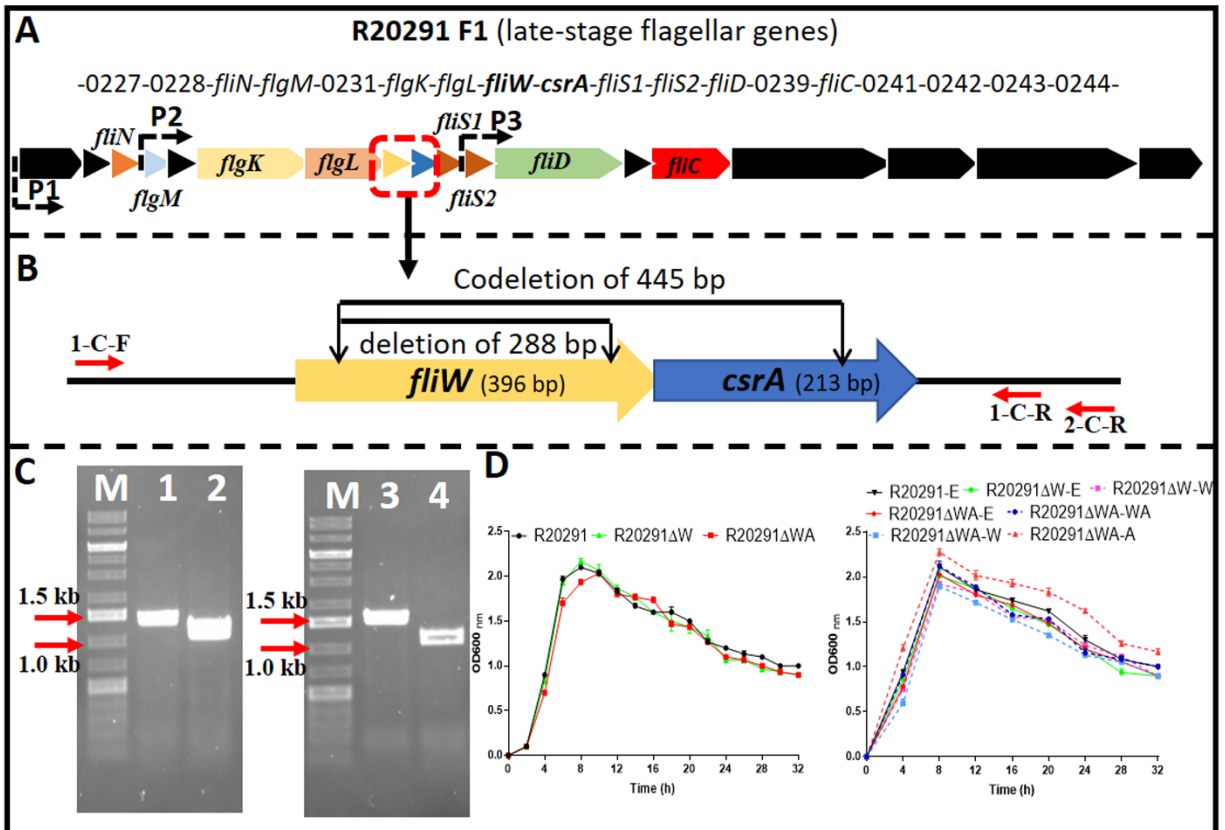

691

692 **Fig. 1. R20291 late-stage flagellar genes (F1) and *fliW* and *fliW-csrA* deletions**

693 (A) Schematic representation of late-stage flagellar genes (F1). Dotted arrows (P1, P2, and P3)  
 694 indicate the potential promoters in F1. (B) Deletion of *fliW* and *fliW-csrA* genes. 1-C-F/R were  
 695 used to verify *fliW* deletion, and 1-C-F and 2-C-R were used to test *fliW-csrA* codeletion. (C)  
 696 Verification of *fliW* and *fliW-csrA* deletions by PCR. M: DNA ladder; 1: R20291 genome as  
 697 PCR template; 2: R20291ΔW genome as PCR template; 3: R20291 genome as PCR template; 4:  
 698 R20291ΔWA genome as PCR template. (D) Growth profile of parent strain and gene deletion  
 699 mutants. Experiments were independently repeated thrice. Bars stand for mean ± SEM. One-way  
 700 ANOVA with post-hoc Tukey test was used for statistical significance.

701

702

703

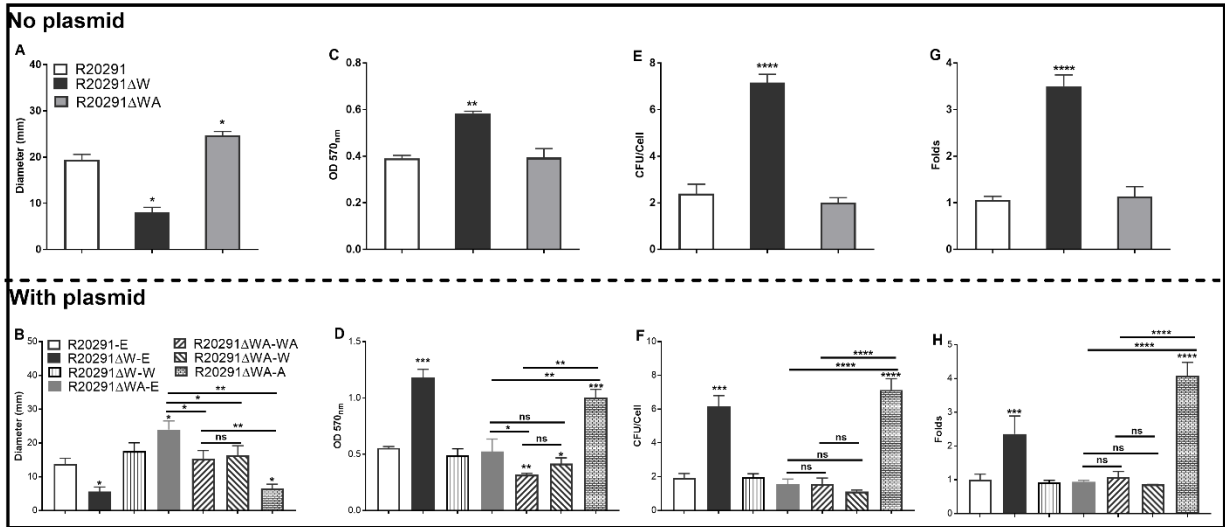

704

705 **Fig. 2. Motility, biofilm, and adhesion analysis**

706 (A) and (B): Halo diameter of motility (swimming analysis on 0.175% agar plate). (C) and (D):  
 707 Biofilm formation analysis. (E) and (F): Adherence of *C. difficile* vegetative cells to HCT-8 cells  
 708 *in vitro*. (G) and (H): Adhesion analysis with 5(6)-CFDA dye. The fluorescence intensity was  
 709 scanned by the Multi-Mode Reader (excitation, 485 nm; emission, 528 nm). The original relative  
 710 fluorescence unit (RFU) was recorded as F0, after PBS wash, the RFU was recorded as F1. The  
 711 adhesion ratio was calculated as follows: F1/F0. Experiments were independently repeated thrice.  
 712 Bars stand for mean  $\pm$  SEM (\* $P < 0.05$ , \*\* $P < 0.01$ , \*\*\* $P < 0.001$ , \*\*\*\* $P < 0.0001$ ). One-way  
 713 ANOVA with post-hoc Tukey test was used for statistical significance. \* directly upon the  
 714 column means the significant difference of the experimental strain compared to R20291 or  
 715 R20291-E.

716

717

718

719

720

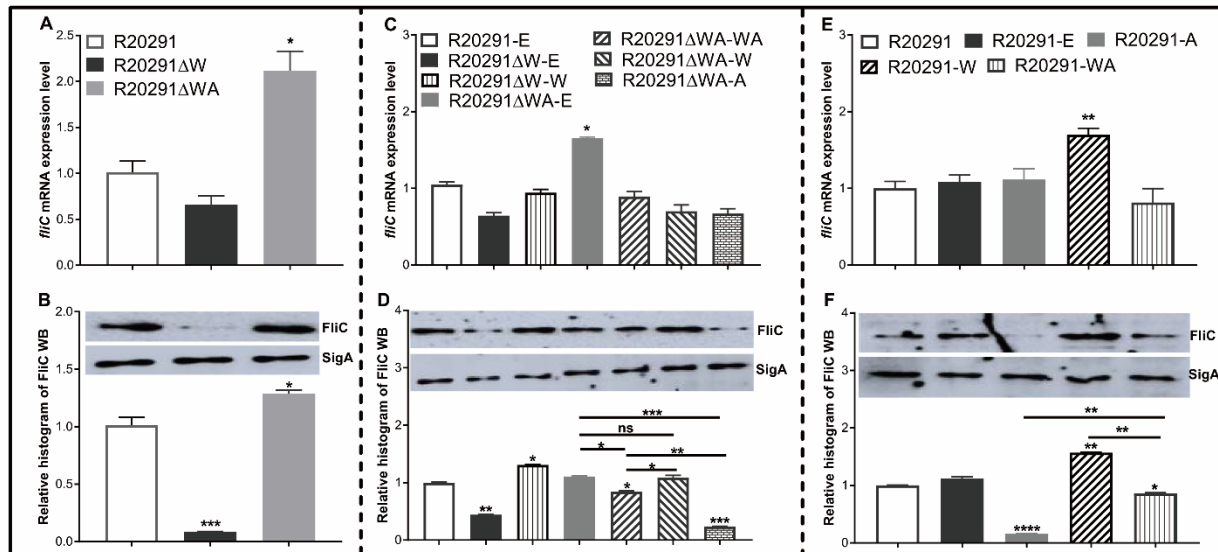

721

722 **Fig. 3. *fliC* expression analysis**

723 (A), (C), and (E) Analysis of *fliC* expression on transcription level. (B), (D), and (F) Analysis of  
 724 *fliC* expression on translation level by Western blot. SigA protein was used as a loading control.  
 725 Experiments were independently repeated thrice. Bars stand for mean ± SEM (\* $P < 0.05$ ,  
 726 \*\* $P < 0.01$ , \*\*\* $P < 0.001$ , \*\*\*\* $P < 0.0001$ ). One-way ANOVA with post-hoc Tukey test was  
 727 used for statistical significance. \* upon the column directly means the significant difference of  
 728 experimental strain compared to R20291 or R20291-E.

729

730

731

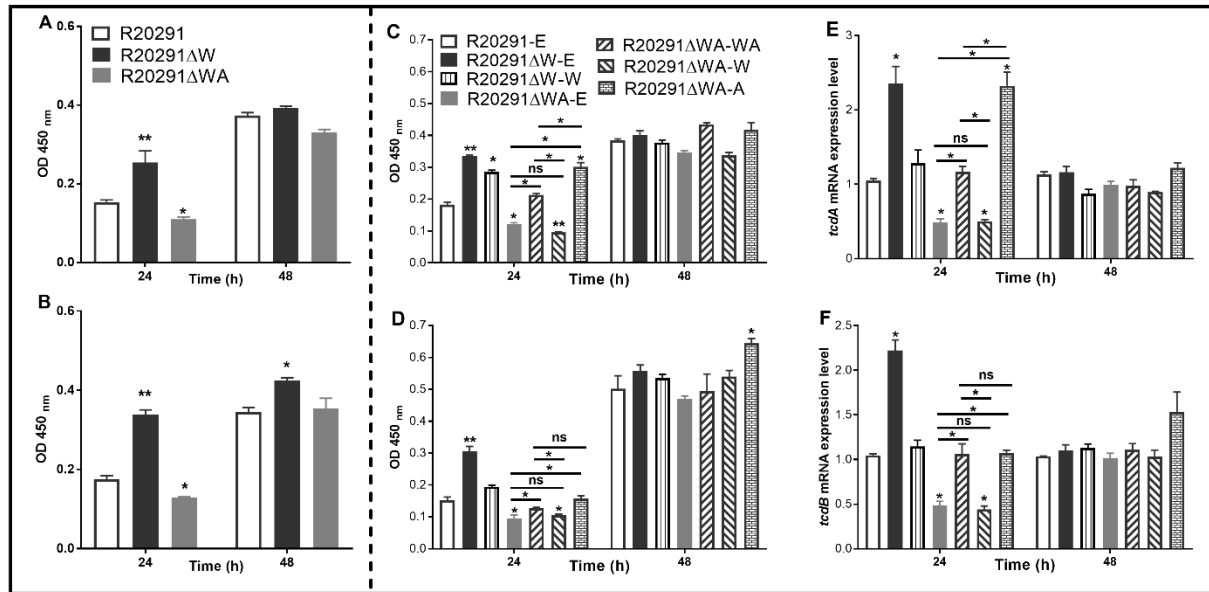

732

733 **Fig. 4. Toxin expression analysis**

734 (A) TcdA concentration in the supernatants of R20291, R20291ΔWA, and R20291ΔW. (B)

735 TcdB concentration in the supernatants of R20291, R20291ΔWA, and R20291ΔW. (C) TcdA

736 concentration in the supernatants of parental and gene complementation strains. (D) TcdB

737 concentration in the supernatants of parental and gene complementation strains. (E)

738 Transcription of *tcdA* in the supernatants of parental and gene complementation strains. (F)

739 Transcription of *tcdB* in the supernatants of parental and gene complementation strains.

740 Experiments were independently repeated thrice. Bars stand for mean ± SEM (\* $P < 0.05$ , \*\* $P <$

741 0.01). One-way ANOVA with post-hoc Tukey test was used for statistical significance. \* upon

742 the column directly means the significant difference of experimental strain compared to R20291

743 or R20291-E.

744

745

746

747

748

749

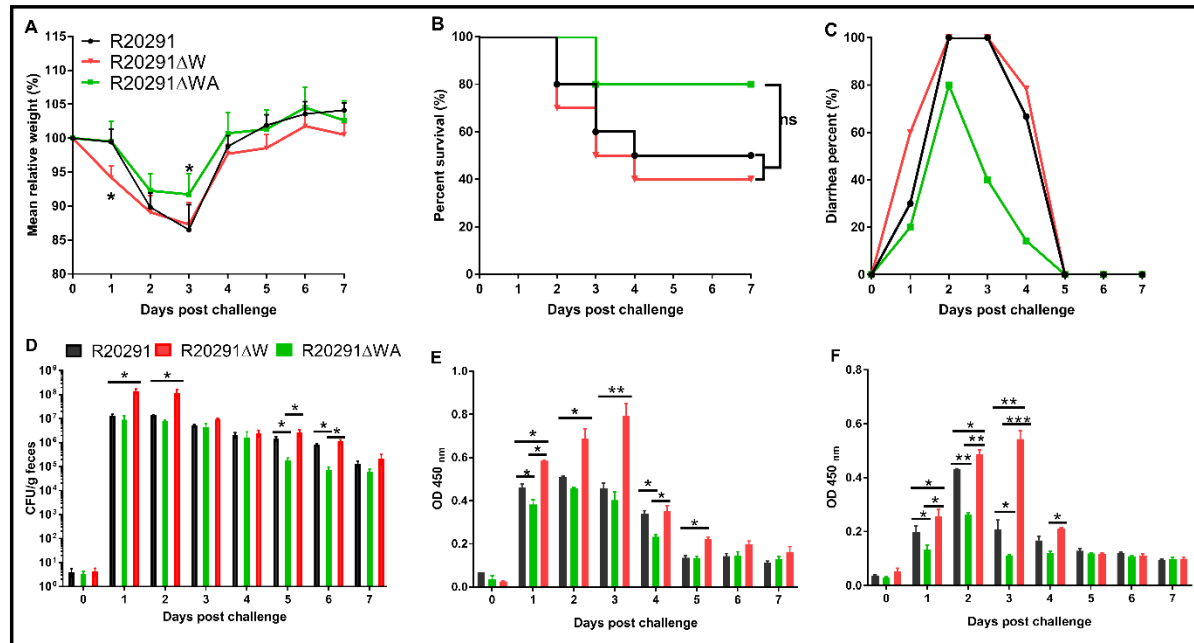

750

751 **Fig. 5. Effects of *fliW* and *fliW-csrA* deletion on *C. difficile* virulence in mice**

752 (A) Mean relative weight changes. (B) Survival curve. (C) Diarrhea percentage. (D) *C. difficile*  
 753 in feces. (E) TcdA titer of fecal sample. (F) TcdB titer of fecal sample. Bars stand for mean ±  
 754 SEM (\* $P < 0.05$ , \*\* $P < 0.01$ ). One-way ANOVA with post-hoc Tukey test was used for  
 755 statistical significance. Animal survivals were analyzed by Kaplan-Meier survival analysis with a  
 756 log-rank test of significance.

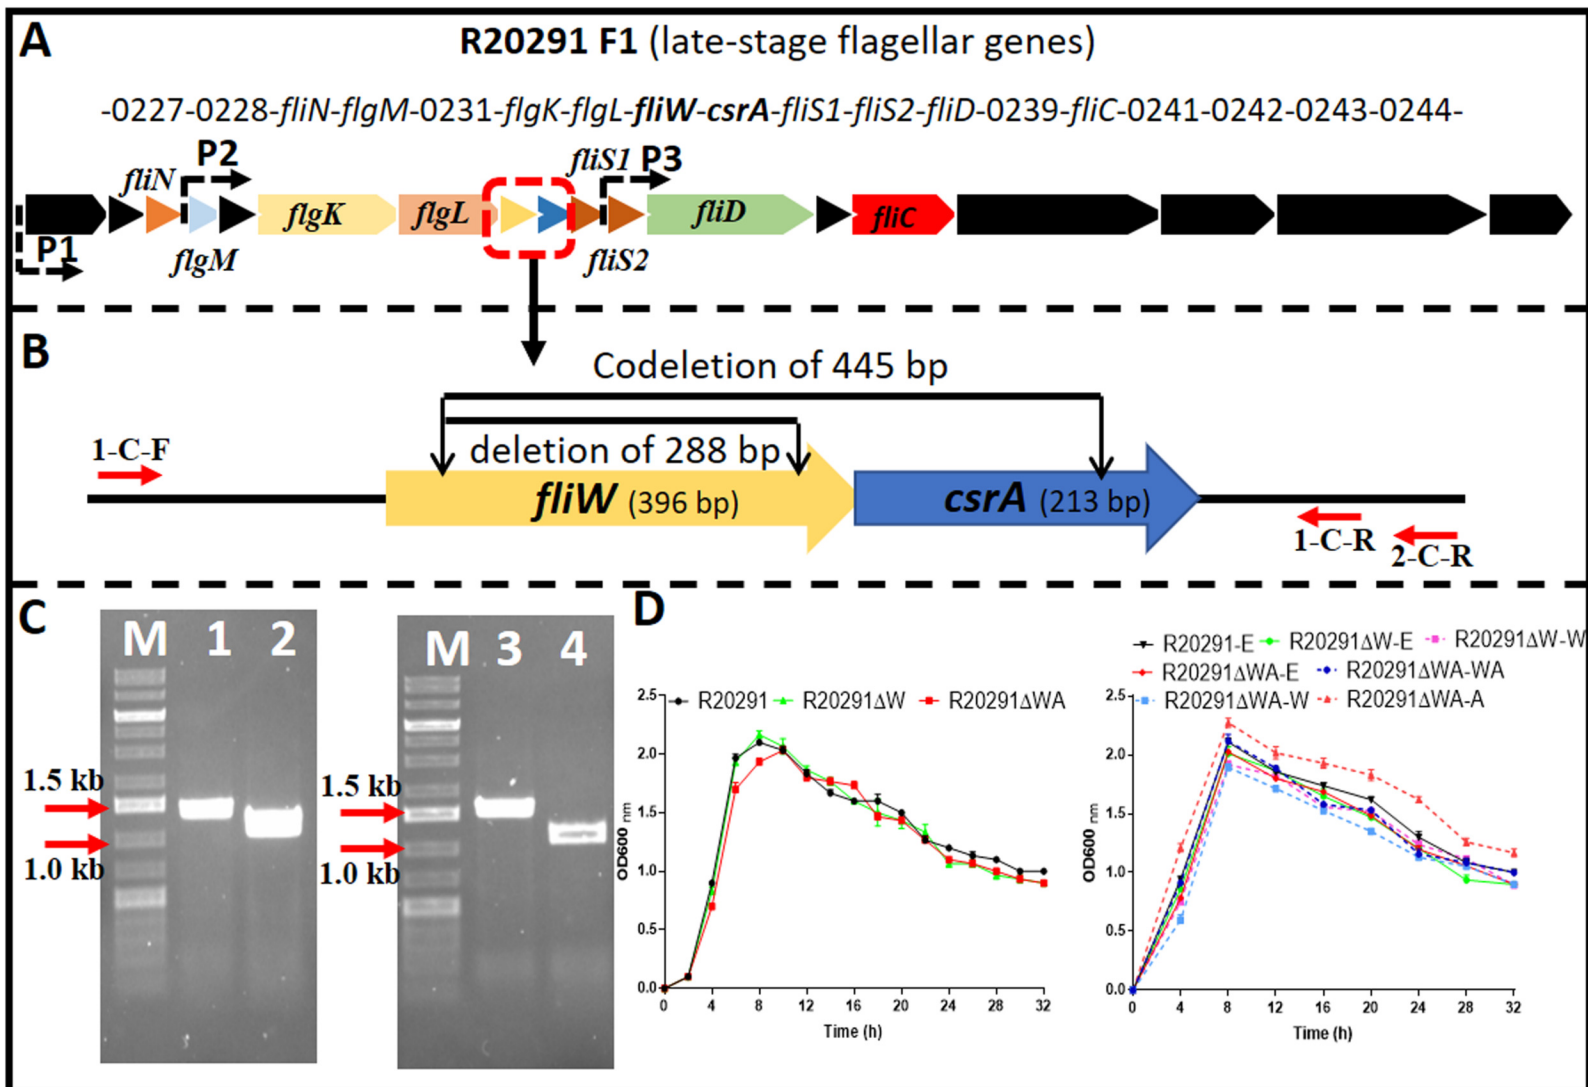

## No plasmid

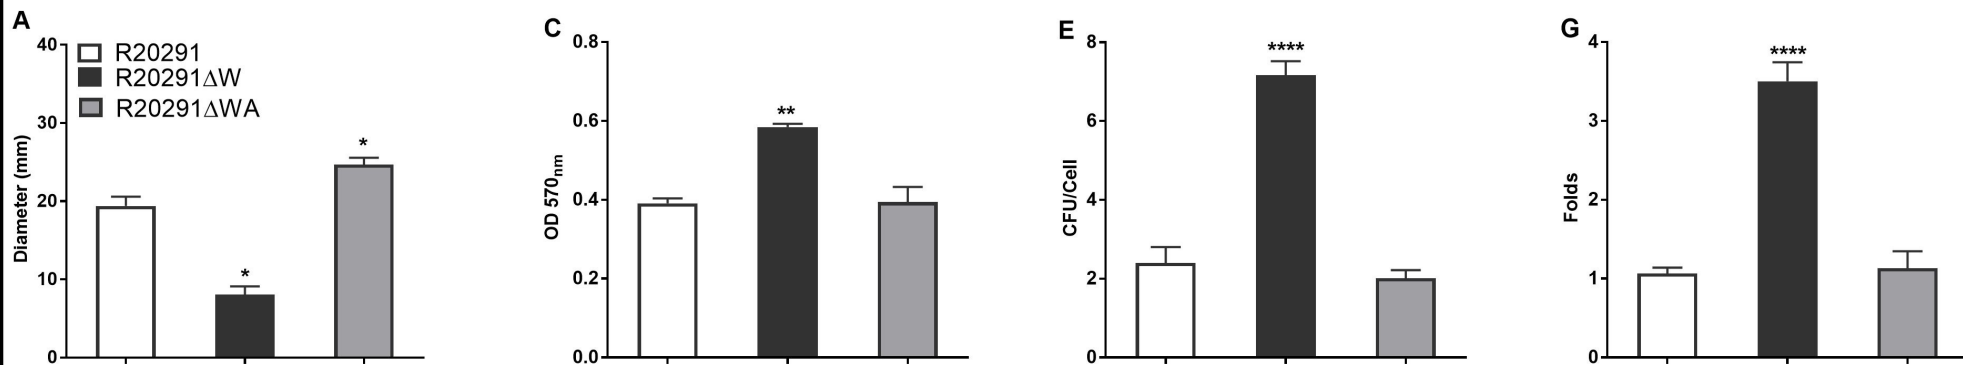

## With plasmid

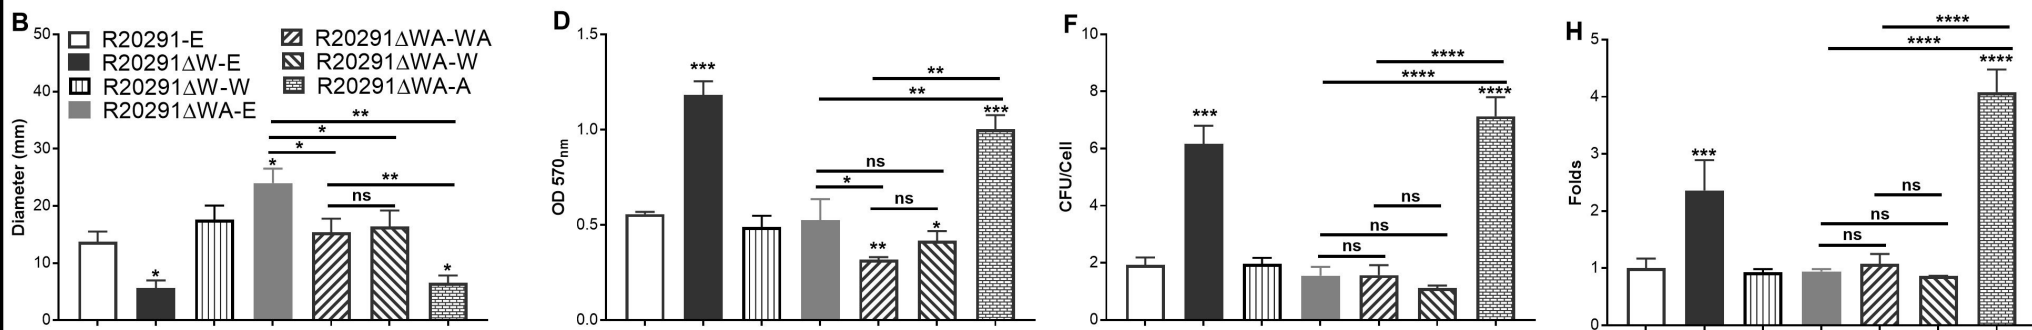

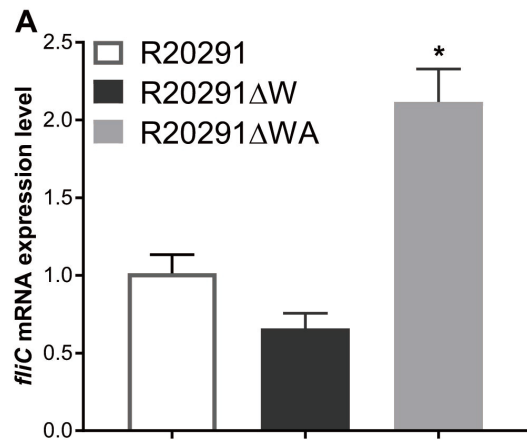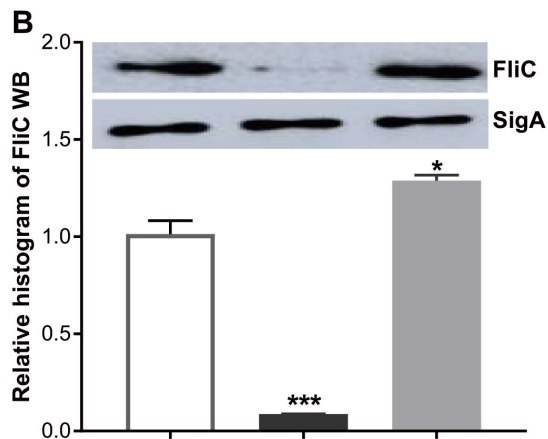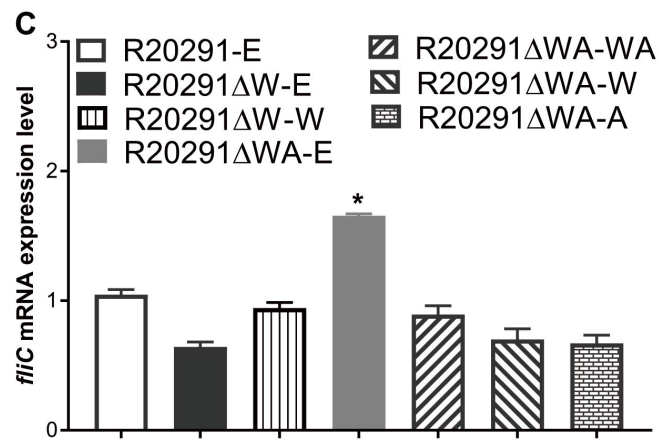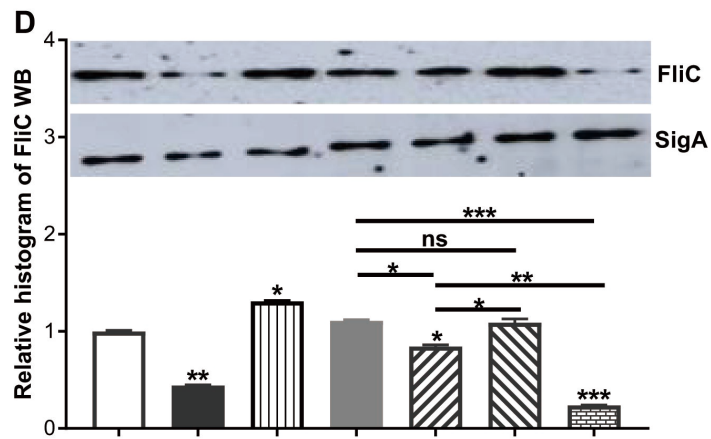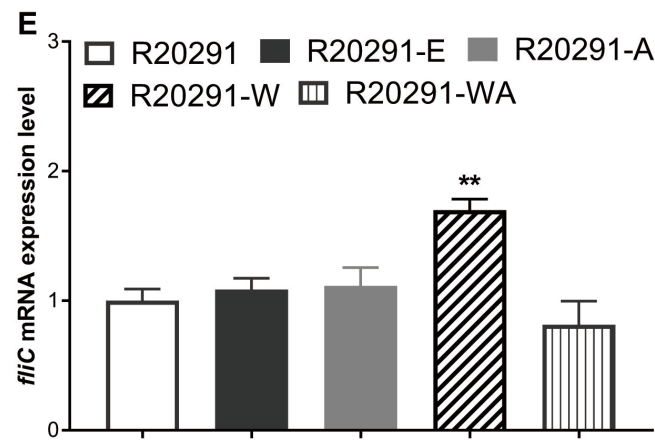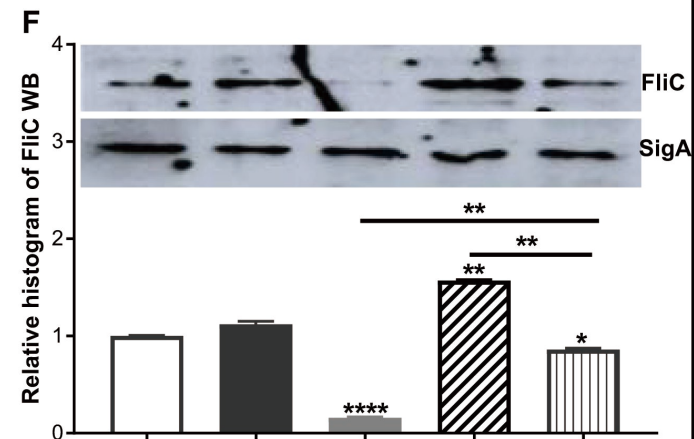



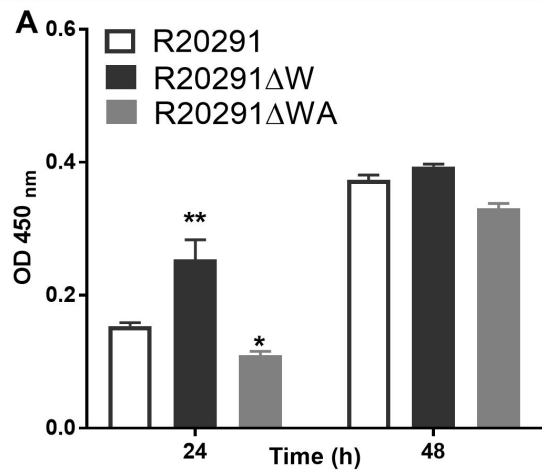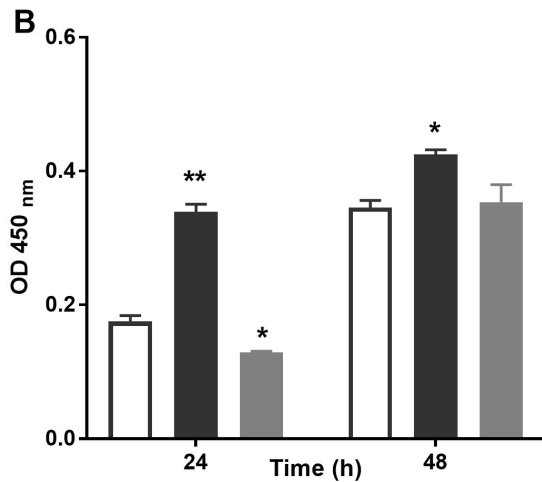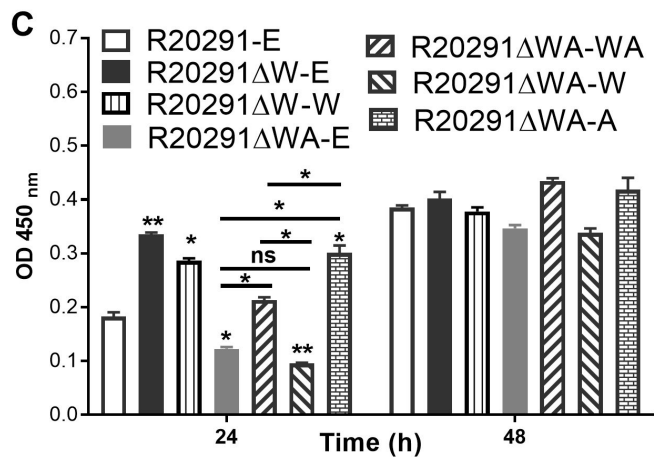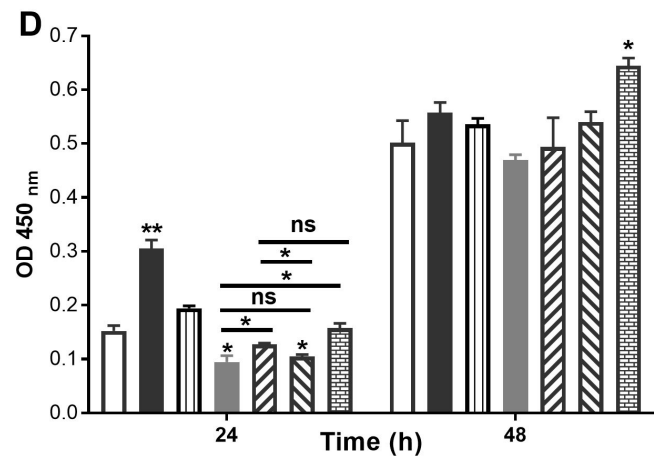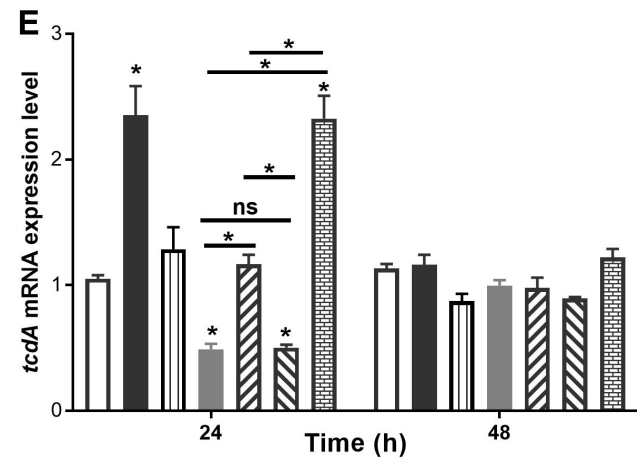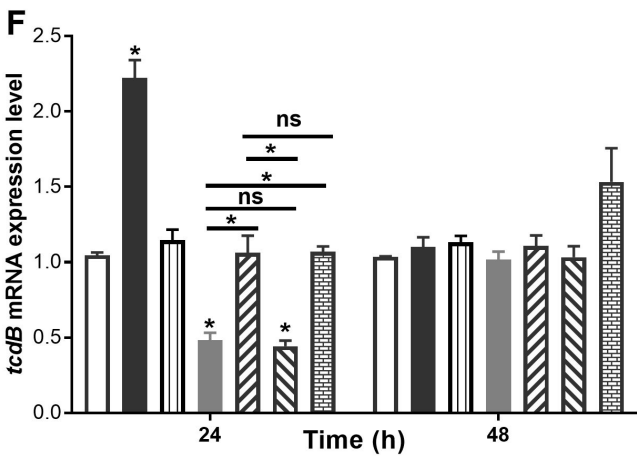

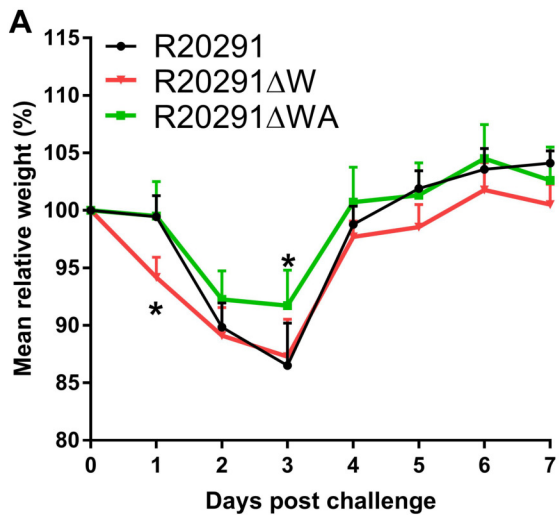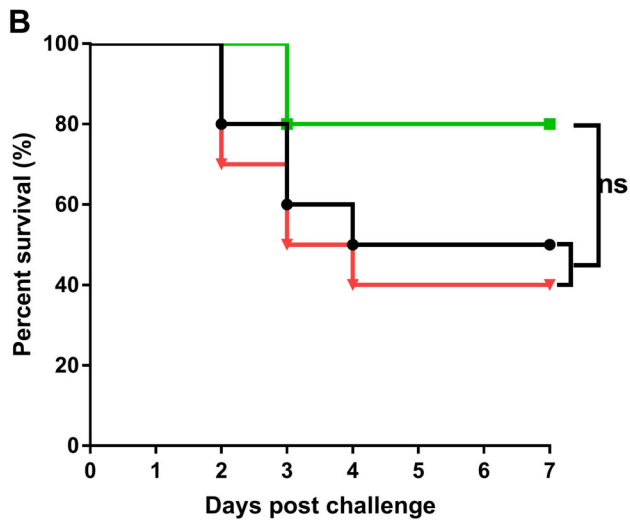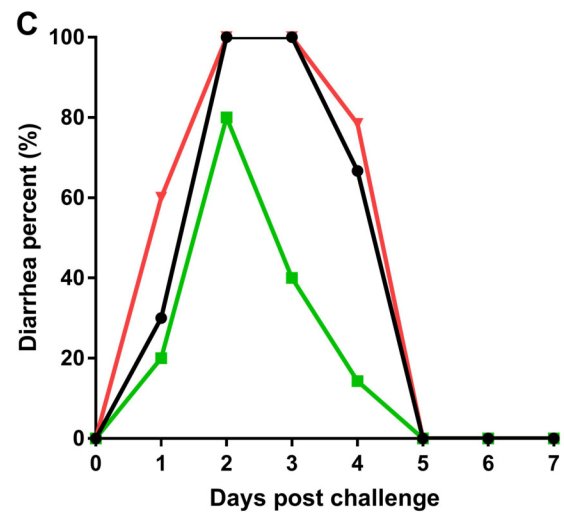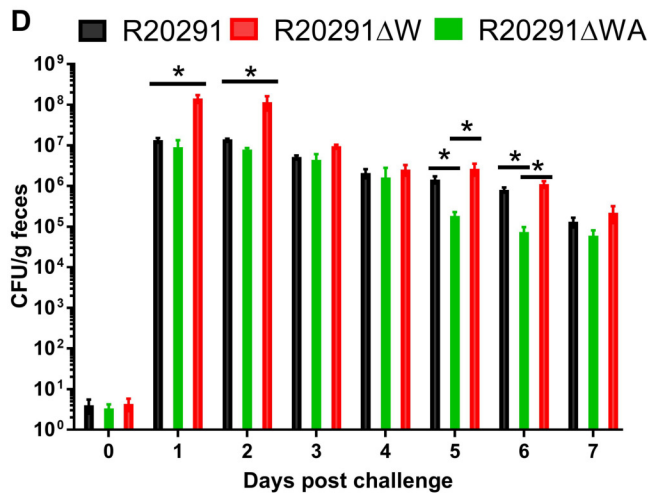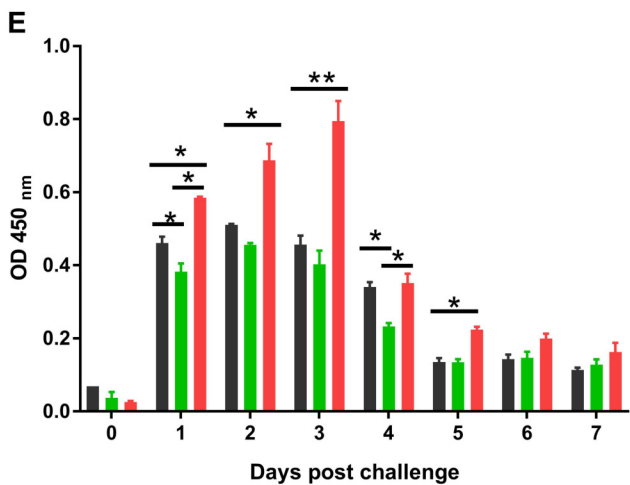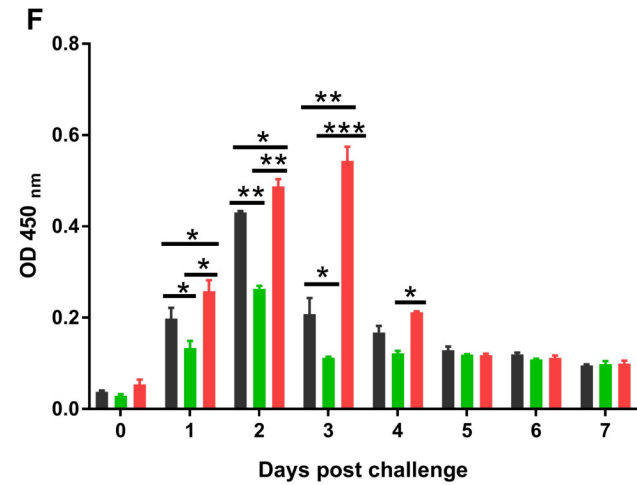

Source: http://biorxiv.org/content/10.1101/2021.05.06.443043v1.full.pdf
